# Supplementary material
Source: publisher figshare collection journal article supplement (https://acs.figshare.com/ndownloader/files/5689359)
Supplement: Supplementary file 1 [file 5689359]

# ic001140c.cif

#=================================================
data_global
#=================================================
 
# 0. AUDIT DETAILS
 
_audit_creation_date                 ' 2000'
_audit_creation_method               'SHELX-97'
_audit_update_record
;
 ?
;
 
#=================================================
 
# 1. SUBMISSION DETAILS
 

_publ_contact_author_name            'Prof. F. Gordon A. Stone'   
_publ_contact_author_address             
; 
Department of Chemistry
Baylor University
PO Box 97348
Waco
TX, 76798-7348
;
 
_publ_contact_author_email           Gordon_Stone@baylor.edu
_publ_contact_author_fax             '254 710 2403'
_publ_contact_author_phone           '254 710 4427'
 
_publ_requested_journal              'Inorganic Chemistry'
# if Acta Crystallographica C - Publication choice FI FM FO CI CM CO AD
_publ_requested_category             ?
_publ_requested_coeditor_name        ?
 
_publ_contact_letter                # Include date of submission
;
Please consider this CIF submission for publication in as a
Regular Structural Paper "journal". 
Manuscript number: 
Title: Silver as an exopolyhedral auxiliary to the rhenacarborane
anion [Re(CO)~3~(\h^5^-7,8-C~2~B~9~H~11~)]^-^.
Date of submission 9/00
;
 
#===============================================
 
# 2. PROCESSING SUMMARY (JOURNAL OFFICE ONLY)
 
_journal_date_recd_electronic        ?
 
_journal_date_to_coeditor            ?
_journal_date_from_coeditor          ?
_journal_date_accepted               ?
 
_journal_date_printers_first         ?
_journal_date_printers_final         ?
_journal_date_proofs_out             ?
_journal_date_proofs_in              ?
 
_journal_coeditor_name               ?
_journal_coeditor_code               ?
_journal_coeditor_notes
; ?
;
 
_journal_techeditor_code             ?
_journal_techeditor_notes
; ?
;
 
_journal_coden_ASTM                  ?
_journal_name_full                   ?
_journal_year                        ?
_journal_volume                      ?
_journal_issue                       ?
_journal_page_first                  ?
_journal_page_last                   ?
 
 
_journal_suppl_publ_number           ?
_journal_suppl_publ_pages            ?
 
 
#================================================
 
# 3. TITLE AND AUTHOR LIST
 
_publ_section_title
;
 ?
;
_publ_section_title_footnote
;
 ?
;
 
# The loop structure below should contain the names and adresses of all
# authors, in the required order of publication. Repeat as necessary.
 
# add authors in order from front of paper remove ? from the next 3 lines e.g.
 
loop_
_publ_author_name
_publ_author_address

 'Stone, F Gordon A' 
; 
  Department of Chemistry
  Baylor University
  Waco
  TX, 76798-7348
  USA
;
'Ellis, Dianne D'
;
  Department of Chemistry
  Baylor University
  Waco
  TX, 76798-7348
  USA
;
'Jelliss, Paul A'
;
  Department of Chemistry
  Baylor University
  Waco
  TX, 76798-7348
  USA
;
'Kautz, Jason, A'
;
  Department of Chemistry
  Baylor University
  Waco
  TX, 76798-7348
  USA
;
'Jeffery, John C'
;
  School of Chemistry
  The University
  Bristol BS8 1TS
  UK
;

#============================================
 
# 4. TEXT
 
_publ_section_synopsis
;
 ?
;
_publ_section_abstract
;
 ?
;
 
# Insert blank lines between paragraphs
 
_publ_section_comment
;
 ?
;
_publ_section_exptl_prep
;
 Crystals were grown by diffusion of light petroleum into
CH~2~Cl~2~ solutions of the complexes.
;
_publ_section_exptl_refinement
; 
Data for 3, 5, and 9 were collected on a Siemens SMART CCD
area-detector three-circle diffractometer. For three or four settings
of \j, narrow data frames were collected for 0.3 \� increments in
\w. For each of the complexes 3 and 9 just over a hemisphere of
data was collected whilst for the crystal of 5 a full sphere of data
was collected. It was confirmed that crystal decay had not taken
place during the course of the data collections. The substantial
redundancy in data allows empirical absorption corrections
(SADABS, Sheldrick, 1996) to be applied using multiple
measurements of equivalent reflections. The data frames were
integrated using SAINT (Bruker, 1995). Diffracted intensities
for 4 and 7 were collected on an Enraf-Nonius CAD-4 operating
in the \w-2\q (4) or \w-4/3\q (7) scan modes. For each structure,
the final unit cell dimensions were determined from the setting
angle values of 25 accurately centered reflections. The stability 
of the crystals during the period of the data collections was
monitored by measuring the intensities of three standard reflections
every two hours. The data were corrected for Lorentz, polarization
and X-ray absorption effects, the latter by a semi-empirical method 
based on azimuthal scans of y data of several Euclerian angles (\c)
near 90\�. All structures were solved by conventional direct
methods and refined by full-matrix least squares on all F^2^ data
using Siemens SHELXTL. For all structures the non-hydrogen
atoms were refined with anisotropic thermal parameters with the
exception of those in the solvent molecule in 3. The agostic
hydrogen atoms H(4) in complex 3, 4, 7,  H(104) and H(204) 
in 5, and H(4), H(8) and H(9) in complex 9 were located from a
final difference Fourier syntheses and their positions were refined,
some with restraints. All other hydrogen atoms were included in
calculated positions and allowed to ride on their parent boron or carbon
atom with fixed isotropic thermal parameters (U~iso~ = 1.2U~iso~
of the parent atom). The CH~2~Cl~2~ molecules in 3, 5, and 7
were disordered and the pentane molecule in 9, which is centered
on a special position, was not assigned any hydrogen atoms. All 
calculations were carried out on Dell PC computers or Silicon
Graphics Iris, Indigo or Indy 
computers.
;
 
# Insert blank lines between references
 
_publ_section_references
;
Siemens (1995). SHELXTL-PC. Version 5.03. Bruker
Analytical X-ray Instruments 
Inc. (1995), Madison, Wisconsin, USA.

 Enraf-Nonius (1989). CAD-4 Software. Version 5. Enraf-Nonius, Delft,
   The Netherlands.

Harms, K. (1993). XCAD4 A Program to extract intensities
from a CAD-4 file.
University of Marburg, Germany.
 
 Sheldrick, G.M. (1997). SHELXL97. Program for crystal structure
   refinement. University of G\\"ottingen, Germany.
 
 Sheldrick, G.M. (1997). SHELXS97. Program for Crystal Structure
   solution. University of G\\"ottingen, Germany.
  
 Wilson, A.J.C. (1992) Ed. International Tables for Crystallography,
   Volume C, Kluwer Academic Publishers, Dordrecht, The Netherlands.
;
_publ_section_figure_captions
;
 ?
;
_publ_section_acknowledgements
; View of the title compound with the atom numbering scheme
Displacement ellipsoids for non-H atoms are drawn at the 40%
probability level
;
 
#================================================

data_3 
 
_audit_creation_method            SHELXL-97 
_chemical_name_systematic 
; 
 ? 
; 
_chemical_name_common             ? 
_chemical_formula_moiety        'C18.75 H24.50 Ag B9 Cl1.50 O3 P Re'   
_chemical_formula_structural 
;
[Re(CO)~3~(\h^5^-C~2~B~9~H~11~)PPh~2~CH~2~]2.0.75(CH~2~Cl~2~)
;
_chemical_formula_sum            'C18.75 H24.50 Ag B9 Cl1.50 O3 P Re' 
_chemical_formula_weight          773.39 
 
loop_ 
 _atom_type_symbol 
 _atom_type_description 
 _atom_type_scat_dispersion_real 
 _atom_type_scat_dispersion_imag 
 _atom_type_scat_source 
 'C'  'C'   0.0033   0.0016 
 'International Tables Vol C Tables 4.2.6.8 and 6.1.1.4' 
 'H'  'H'   0.0000   0.0000 
 'International Tables Vol C Tables 4.2.6.8 and 6.1.1.4' 
 'B'  'B'   0.0013   0.0007 
 'International Tables Vol C Tables 4.2.6.8 and 6.1.1.4' 
 'Cl'  'Cl'   0.1484   0.1585 
 'International Tables Vol C Tables 4.2.6.8 and 6.1.1.4' 
 'O'  'O'   0.0106   0.0060 
 'International Tables Vol C Tables 4.2.6.8 and 6.1.1.4' 
 'P'  'P'   0.1023   0.0942 
 'International Tables Vol C Tables 4.2.6.8 and 6.1.1.4' 
 'Ag'  'Ag'  -0.8971   1.1015 
 'International Tables Vol C Tables 4.2.6.8 and 6.1.1.4' 
 'Re'  'Re'  -1.0185   7.2310 
 'International Tables Vol C Tables 4.2.6.8 and 6.1.1.4' 
 
_symmetry_cell_setting            Monoclinic 
_symmetry_space_group_name_H-M    'C 2/c' 
_symmetry_space_group_name_Hall   '-C 2yc' 
 
loop_ 
 _symmetry_equiv_pos_as_xyz 
 'x, y, z' 
 '-x, y, -z+1/2' 
 'x+1/2, y+1/2, z' 
 '-x+1/2, y+1/2, -z+1/2' 
 '-x, -y, -z' 
 'x, -y, z-1/2' 
 '-x+1/2, -y+1/2, -z' 
 'x+1/2, -y+1/2, z-1/2' 
 
_cell_length_a                    21.120(3) 
_cell_length_b                    11.5944(19) 
_cell_length_c                    22.926(3) 
_cell_angle_alpha                 90.00 
_cell_angle_beta                  94.078(10) 
_cell_angle_gamma                 90.00 
_cell_volume                      5599.7(14) 
_cell_formula_units_Z             8 
_cell_measurement_temperature     173(2) 
_cell_measurement_reflns_used     206 
_cell_measurement_theta_min       5 
_cell_measurement_theta_max       50 
 
_exptl_crystal_description        plate 
_exptl_crystal_colour             colorless 
_exptl_crystal_size_max           0.40 
_exptl_crystal_size_mid           0.34 
_exptl_crystal_size_min           0.14  
_exptl_crystal_density_meas       ? 
_exptl_crystal_density_diffrn     1.835 
_exptl_crystal_density_method     'not measured' 
_exptl_crystal_F_000              2948 
_exptl_absorpt_coefficient_mu     5.240 
_exptl_absorpt_correction_type    multi-scan 
_exptl_absorpt_correction_T_min   0.48293
_exptl_absorpt_correction_T_max   0.86208
_exptl_absorpt_process_details    '(SADABS; Sheldrick, 1997)' 
 
_exptl_special_details 
; 
 Unit cell dimensions were determined from reflections taken from four
sets of 30 frames (at 0.3\% steps in \w) each at 10 seconds exposure,
 for which all strong reflections in the complete data set were used.
A full hemisphere of reciprocal space was scanned by 0.3\% \w steps at three
different \f angles.  Crystal decay was monitored by
repeating the initial 50 frames at the end of data collection and
analyzing the duplicate reflections. No decay was observed. 
;
 
_diffrn_ambient_temperature       173(2) 
_diffrn_radiation_wavelength      0.71073 
_diffrn_radiation_type            MoK\a 
_diffrn_radiation_source          'fine-focus sealed tube' 
_diffrn_radiation_monochromator   graphite 
_diffrn_measurement_device_type   'SMART CCD Detector' 
_diffrn_measurement_method        '\w rotation with narrow frames' 
_diffrn_detector_area_resol_mean  60 
_diffrn_standards_number          ? 
_diffrn_standards_interval_count  ? 
_diffrn_standards_interval_time   ? 
_diffrn_standards_decay_%         none 
_diffrn_reflns_number             9007 
_diffrn_reflns_av_R_equivalents   0.0236 
_diffrn_reflns_av_sigmaI/netI     0.0377 
_diffrn_reflns_limit_h_min        -25 
_diffrn_reflns_limit_h_max        18 
_diffrn_reflns_limit_k_min        -8 
_diffrn_reflns_limit_k_max        13 
_diffrn_reflns_limit_l_min        -24 
_diffrn_reflns_limit_l_max        24 
_diffrn_reflns_theta_min          1.93 
_diffrn_reflns_theta_max          25.00 
_reflns_number_total              4440 
_reflns_number_gt                 3722 
_reflns_threshold_expression      >2sigma(I) 
 
_computing_data_collection        'SMART (Siemens, 1995)'
_computing_cell_refinement        'SAINT (Siemens, 1995)'
_computing_data_reduction         'SAINT (Siemens, 1995)'
_computing_structure_solution     'SHELXS-97 (Sheldrick, 1997)' 
_computing_structure_refinement   'SHELXL-97 (Sheldrick, 1997)' 
_computing_molecular_graphics     'SHELXTL (Siemens, 1995)'
_computing_publication_material   'SHELXTL (Siemens, 1995)'
 
_refine_special_details 
; 
 Refinement of F^2^ against ALL reflections.  The weighted R-factor wR and 
 goodness of fit S are based on F^2^, conventional R-factors R are based 
 on F, with F set to zero for negative F^2^. The threshold expression of 
 F^2^ > 2sigma(F^2^) is used only for calculating R-factors(gt) etc. and is 
 not relevant to the choice of reflections for refinement.  R-factors based 
 on F^2^ are statistically about twice as large as those based on F, and R- 
 factors based on ALL data will be even larger. 
; 
 
_refine_ls_structure_factor_coef  Fsqd  
_refine_ls_matrix_type            full 
_refine_ls_weighting_scheme 
;
calc w=1/[\s^2^(Fo^2^)+(0.0350P)^2^+0.0000P] where
P=(Fo^2^+2Fc^2^)/3
;
_atom_sites_solution_primary      direct 
_atom_sites_solution_secondary    difmap 
_atom_sites_solution_hydrogens    geom 
_refine_ls_hydrogen_treatment     mixed 
_refine_ls_extinction_method      none 
_refine_ls_extinction_coef        ? 
_refine_ls_number_reflns          4440 
_refine_ls_number_parameters      319 
_refine_ls_number_restraints      4 
_refine_ls_R_factor_all           0.0320 
_refine_ls_R_factor_gt            0.0260 
_refine_ls_wR_factor_ref          0.0633 
_refine_ls_wR_factor_gt           0.0623 
_refine_ls_goodness_of_fit_ref    0.965 
_refine_ls_restrained_S_all       0.997 
_refine_ls_shift/su_max           0.003 
_refine_ls_shift/su_mean          0.000 
 
loop_ 
 _atom_site_label 
 _atom_site_type_symbol 
 _atom_site_fract_x 
 _atom_site_fract_y 
 _atom_site_fract_z 
 _atom_site_U_iso_or_equiv 
 _atom_site_adp_type 
 _atom_site_occupancy 
 _atom_site_calc_flag 
 _atom_site_refinement_flags 
 _atom_site_disorder_assembly 
 _atom_site_disorder_group 
Re Re 0.137601(10) 0.331626(16) 0.843156(9) 0.02594(8) Uani 1 d . . . 
C3 C 0.1765(3) 0.1985(5) 0.8814(3) 0.0360(14) Uani 1 d . . . 
O3 O 0.2004(2) 0.1189(4) 0.90272(19) 0.0539(12) Uani 1 d . . . 
C4 C 0.0588(3) 0.2718(5) 0.8680(2) 0.0364(14) Uani 1 d . . . 
O4 O 0.0115(2) 0.2334(4) 0.88079(19) 0.0477(11) Uani 1 d . . . 
C5 C 0.1576(3) 0.4073(5) 0.9168(3) 0.0356(14) Uani 1 d . . . 
O5 O 0.1723(2) 0.4522(4) 0.96117(19) 0.0519(12) Uani 1 d . . . 
C1 C 0.1684(3) 0.2666(4) 0.7551(2) 0.0292(13) Uani 1 d . . . 
H1 H 0.1744 0.1722 0.7645 0.035 Uiso 1 calc R . . 
C2 C 0.2192(3) 0.3601(5) 0.7825(3) 0.0337(14) Uani 1 d . . . 
H2 H 0.2618 0.3336 0.8113 0.040 Uiso 1 calc R . . 
B3 B 0.1836(3) 0.4885(5) 0.7955(3) 0.0357(16) Uani 1 d . . . 
H3 H 0.1993 0.5516 0.8306 0.043 Uiso 1 calc R . . 
B4 B 0.1007(3) 0.4685(5) 0.7696(3) 0.0297(15) Uani 1 d . . . 
H4 H 0.062(2) 0.528(4) 0.773(2) 0.036 Uiso 1 d . . . 
B5 B 0.0946(3) 0.3189(5) 0.7464(3) 0.0307(15) Uani 1 d . . . 
H5 H 0.0500 0.2671 0.7482 0.037 Uiso 1 calc R . . 
B6 B 0.1422(3) 0.3026(5) 0.6852(3) 0.0352(16) Uani 1 d . . . 
H6 H 0.1293 0.2399 0.6492 0.042 Uiso 1 calc R . . 
B7 B 0.2216(3) 0.3263(6) 0.7095(3) 0.0416(17) Uani 1 d . . . 
H7 H 0.2612 0.2787 0.6901 0.050 Uiso 1 calc R . . 
B8 B 0.2301(3) 0.4695(6) 0.7339(3) 0.0425(18) Uani 1 d . . . 
H8 H 0.2757 0.5175 0.7304 0.051 Uiso 1 calc R . . 
B9 B 0.1555(3) 0.5371(5) 0.7244(3) 0.0335(16) Uani 1 d . . . 
H9 H 0.1513 0.6313 0.7141 0.040 Uiso 1 calc R . . 
B10 B 0.1002(3) 0.4327(5) 0.6946(3) 0.0335(15) Uani 1 d . . . 
H10 H 0.0585 0.4570 0.6642 0.040 Uiso 1 calc R . . 
B11 B 0.1791(3) 0.4371(5) 0.6719(3) 0.0378(17) Uani 1 d . . . 
H11 H 0.1898 0.4650 0.6269 0.045 Uiso 1 calc R . . 
Ag Ag 0.05035(2) 0.52608(3) 0.857672(18) 0.03217(12) Uani 1 d . . . 
P P 0.03329(6) 0.63882(11) 0.94247(6) 0.0249(3) Uani 1 d . . . 
C6 C 0.0265(2) 0.5444(4) 1.0055(2) 0.0257(12) Uani 1 d . . . 
H6B H 0.0673 0.5039 1.0144 0.031 Uiso 1 calc R . . 
H6C H 0.0177 0.5917 1.0400 0.031 Uiso 1 calc R . . 
C11 C -0.0370(2) 0.7293(4) 0.9443(2) 0.0257(12) Uani 1 d . . . 
C12 C -0.0923(3) 0.6948(5) 0.9139(3) 0.0401(15) Uani 1 d . . . 
H12 H -0.0919 0.6288 0.8894 0.048 Uiso 1 calc R . . 
C13 C -0.1486(3) 0.7546(6) 0.9184(3) 0.0494(17) Uani 1 d . . . 
H13 H -0.1864 0.7292 0.8974 0.059 Uiso 1 calc R . . 
C14 C -0.1494(3) 0.8515(6) 0.9535(3) 0.0551(19) Uani 1 d . . . 
H14 H -0.1880 0.8922 0.9571 0.066 Uiso 1 calc R . . 
C15 C -0.0940(3) 0.8891(5) 0.9835(3) 0.0507(18) Uani 1 d . . . 
H15 H -0.0944 0.9568 1.0068 0.061 Uiso 1 calc R . . 
C16 C -0.0377(3) 0.8280(5) 0.9794(3) 0.0425(15) Uani 1 d . . . 
H16 H 0.0002 0.8532 1.0004 0.051 Uiso 1 calc R . . 
C21 C 0.1007(2) 0.7314(4) 0.9614(2) 0.0262(12) Uani 1 d . . . 
C22 C 0.1228(3) 0.7560(4) 1.0185(3) 0.0336(13) Uani 1 d . . . 
H22 H 0.1021 0.7239 1.0501 0.040 Uiso 1 calc R . . 
C23 C 0.1753(3) 0.8276(5) 1.0296(3) 0.0389(15) Uani 1 d . . . 
H23 H 0.1907 0.8435 1.0687 0.047 Uiso 1 calc R . . 
C24 C 0.2048(3) 0.8750(5) 0.9837(3) 0.0401(16) Uani 1 d . . . 
H24 H 0.2398 0.9257 0.9912 0.048 Uiso 1 calc R . . 
C25 C 0.1839(3) 0.8494(5) 0.9267(3) 0.0491(17) Uani 1 d . . . 
H25 H 0.2051 0.8814 0.8953 0.059 Uiso 1 calc R . . 
C26 C 0.1326(3) 0.7779(5) 0.9150(3) 0.0390(15) Uani 1 d . . . 
H26 H 0.1188 0.7600 0.8758 0.047 Uiso 1 calc R . . 
C41 C 0.0000 0.957(4) 0.7500 0.27(3) Uiso 0.50 d SPD . 1 
H41A H -0.0222 1.0019 0.7181 0.319 Uiso 0.25 calc PR . 1 
H41B H 0.0222 1.0019 0.7819 0.319 Uiso 0.25 calc PR . 1 
Cl3 Cl -0.0284(17) 0.825(2) 0.7656(19) 0.61(2) Uiso 0.50 d PD . 1 
C40 C -0.0550(15) 1.005(4) 0.8440(15) 0.28(2) Uiso 0.50 d PD A 2 
H40A H -0.0668 0.9673 0.8804 0.338 Uiso 0.50 calc PR A 2 
H40B H -0.0612 1.0896 0.8471 0.338 Uiso 0.50 calc PR A 2 
Cl1 Cl 0.0243(12) 0.969(2) 0.8270(11) 0.482(13) Uiso 0.50 d PD A 2 
Cl2 Cl -0.0916(6) 0.9542(12) 0.7890(6) 0.263(5) Uiso 0.50 d PD A 2 
 
loop_ 
 _atom_site_aniso_label 
 _atom_site_aniso_U_11 
 _atom_site_aniso_U_22 
 _atom_site_aniso_U_33 
 _atom_site_aniso_U_23 
 _atom_site_aniso_U_13 
 _atom_site_aniso_U_12 
Re 0.02783(13) 0.02622(11) 0.02414(14) 0.00135(9) 0.00448(9) 0.00178(9) 
C3 0.040(4) 0.036(3) 0.033(4) 0.001(3) 0.012(3) -0.002(3) 
O3 0.060(3) 0.045(3) 0.059(3) 0.021(2) 0.017(2) 0.017(2) 
C4 0.048(4) 0.035(3) 0.025(4) 0.007(2) 0.000(3) 0.002(3) 
O4 0.040(3) 0.060(3) 0.045(3) 0.008(2) 0.012(2) -0.010(2) 
C5 0.029(3) 0.036(3) 0.042(4) 0.001(3) 0.000(3) 0.004(2) 
O5 0.052(3) 0.065(3) 0.038(3) -0.016(2) -0.006(2) 0.001(2) 
C1 0.036(3) 0.027(3) 0.027(3) 0.002(2) 0.017(3) 0.005(2) 
C2 0.025(3) 0.036(3) 0.041(4) 0.011(2) 0.008(3) 0.000(2) 
B3 0.041(4) 0.030(3) 0.036(4) 0.002(3) -0.002(3) -0.001(3) 
B4 0.036(4) 0.032(3) 0.022(4) 0.000(3) 0.007(3) 0.010(3) 
B5 0.031(4) 0.037(3) 0.025(4) -0.002(3) 0.009(3) -0.002(3) 
B6 0.047(4) 0.037(3) 0.023(4) 0.000(3) 0.013(3) 0.002(3) 
B7 0.041(4) 0.048(4) 0.038(5) 0.012(3) 0.018(3) 0.010(3) 
B8 0.031(4) 0.046(4) 0.052(5) 0.016(3) 0.009(4) -0.002(3) 
B9 0.040(4) 0.030(3) 0.031(4) 0.006(3) 0.007(3) 0.002(3) 
B10 0.032(4) 0.040(4) 0.028(4) -0.001(3) 0.003(3) 0.005(3) 
B11 0.035(4) 0.040(4) 0.040(5) 0.009(3) 0.013(3) 0.004(3) 
Ag 0.0393(3) 0.0322(2) 0.0258(3) -0.00461(17) 0.0082(2) 0.00452(17) 
P 0.0288(8) 0.0238(6) 0.0231(8) -0.0010(5) 0.0079(6) -0.0012(5) 
C6 0.027(3) 0.026(3) 0.025(3) 0.000(2) 0.008(2) -0.004(2) 
C11 0.027(3) 0.025(3) 0.026(3) 0.000(2) 0.010(2) 0.002(2) 
C12 0.043(4) 0.037(3) 0.040(4) -0.004(3) 0.003(3) 0.000(3) 
C13 0.033(4) 0.056(4) 0.058(5) -0.008(3) -0.006(3) 0.006(3) 
C14 0.041(4) 0.055(4) 0.069(5) -0.003(3) 0.003(4) 0.017(3) 
C15 0.053(4) 0.039(3) 0.061(5) -0.013(3) 0.005(4) 0.014(3) 
C16 0.038(3) 0.040(3) 0.049(4) -0.008(3) -0.003(3) 0.003(3) 
C21 0.030(3) 0.021(2) 0.029(3) -0.002(2) 0.009(3) 0.002(2) 
C22 0.035(3) 0.032(3) 0.035(4) 0.004(2) 0.009(3) -0.004(2) 
C23 0.036(3) 0.034(3) 0.045(4) -0.003(3) 0.000(3) -0.002(3) 
C24 0.030(3) 0.027(3) 0.065(5) -0.010(3) 0.012(3) -0.005(2) 
C25 0.057(4) 0.039(4) 0.056(5) -0.005(3) 0.034(4) -0.014(3) 
C26 0.048(4) 0.038(3) 0.033(4) -0.004(3) 0.020(3) -0.011(3) 
 
_geom_special_details 
; 
 All esds (except the esd in the dihedral angle between two l.s. planes) 
 are estimated using the full covariance matrix.  The cell esds are taken 
 into account individually in the estimation of esds in distances, angles 
 and torsion angles; correlations between esds in cell parameters are only 
 used when they are defined by crystal symmetry.  An approximate (isotropic) 
 treatment of cell esds is used for estimating esds involving l.s. planes. 
; 
 
loop_ 
 _geom_bond_atom_site_label_1 
 _geom_bond_atom_site_label_2 
 _geom_bond_distance 
 _geom_bond_site_symmetry_2 
 _geom_bond_publ_flag 
Re C5 1.923(6) . y 
Re C4 1.925(7) . y 
Re C3 1.931(6) . y 
Re C1 2.292(5) . y 
Re C2 2.313(6) . y 
Re B5 2.341(6) . y 
Re B3 2.367(6) . y 
Re B4 2.405(6) . y 
Re Ag 2.9457(6) . y 
C3 O3 1.143(6) . y 
C4 O4 1.152(7) . y 
C5 O5 1.165(7) . y 
C1 C2 1.620(7) . ? 
C1 B5 1.673(8) . ? 
C1 B6 1.709(8) . ? 
C1 B7 1.733(9) . ? 
C2 B3 1.704(8) . ? 
C2 B8 1.715(8) . ? 
C2 B7 1.725(9) . ? 
B3 B9 1.785(9) . ? 
B3 B8 1.790(11) . ? 
B3 B4 1.824(9) . ? 
B4 B10 1.767(9) . ? 
B4 B9 1.793(9) . ? 
B4 B5 1.815(8) . ? 
B4 Ag 2.442(6) . y 
B5 B10 1.784(9) . ? 
B5 B6 1.794(10) . ? 
B6 B7 1.749(10) . ? 
B6 B10 1.772(9) . ? 
B6 B11 1.779(9) . ? 
B7 B11 1.757(9) . ? 
B7 B8 1.757(10) . ? 
B8 B9 1.759(9) . ? 
B8 B11 1.762(10) . ? 
B9 B11 1.769(9) . ? 
B9 B10 1.784(9) . ? 
B10 B11 1.782(9) . ? 
Ag H4 1.96(5) . y 
Ag P 2.3912(14) . y 
Ag H10 2.45(5) 2_555 y
Ag B10 3.490(9) 2_555 y
P C21 1.811(5) . ? 
P C11 1.821(5) . ? 
P C6 1.827(5) . ? 
C6 C6 1.528(9) 5_567 ? 
C11 C12 1.376(7) . ? 
C11 C16 1.399(7) . ? 
C12 C13 1.386(8) . ? 
C13 C14 1.384(9) . ? 
C14 C15 1.383(9) . ? 
C15 C16 1.394(8) . ? 
C21 C22 1.387(7) . ? 
C21 C26 1.406(7) . ? 
C22 C23 1.394(7) . ? 
C23 C24 1.375(8) . ? 
C24 C25 1.383(9) . ? 
C25 C26 1.374(8) . ? 
C41 Cl3 1.69(3) 2_556 ? 
C41 Cl3 1.69(3) . ? 
Cl3 Cl3 1.44(7) 2_556 ? 
C40 Cl2 1.55(3) . ? 
C40 Cl1 1.79(2) . ? 
 
loop_ 
 _geom_angle_atom_site_label_1 
 _geom_angle_atom_site_label_2 
 _geom_angle_atom_site_label_3 
 _geom_angle 
 _geom_angle_site_symmetry_1 
 _geom_angle_site_symmetry_3 
 _geom_angle_publ_flag 
C5 Re C4 92.6(2) . . y 
C5 Re C3 84.6(2) . . y 
C4 Re C3 85.8(2) . . y 
C5 Re C1 149.9(2) . . ? 
C4 Re C1 116.6(2) . . ? 
C3 Re C1 89.9(2) . . ? 
C5 Re C2 109.6(2) . . ? 
C4 Re C2 157.7(2) . . ? 
C3 Re C2 94.3(2) . . ? 
C1 Re C2 41.18(19) . . ? 
C5 Re B5 155.1(2) . . ? 
C4 Re B5 88.4(2) . . ? 
C3 Re B5 120.3(2) . . ? 
C1 Re B5 42.3(2) . . ? 
C2 Re B5 72.3(2) . . ? 
C5 Re B3 89.0(2) . . ? 
C4 Re B3 143.6(2) . . ? 
C3 Re B3 130.5(2) . . ? 
C1 Re B3 72.2(2) . . ? 
C2 Re B3 42.7(2) . . ? 
B5 Re B3 75.8(2) . . ? 
C5 Re B4 110.8(2) . . ? 
C4 Re B4 101.6(2) . . ? 
C3 Re B4 162.3(2) . . ? 
C1 Re B4 72.4(2) . . ? 
C2 Re B4 72.7(2) . . ? 
B5 Re B4 45.0(2) . . ? 
B3 Re B4 44.9(2) . . ? 
C5 Re Ag 69.64(16) . . ? 
C4 Re Ag 71.43(17) . . ? 
C3 Re Ag 144.13(17) . . ? 
C1 Re Ag 124.80(13) . . ? 
C2 Re Ag 117.23(13) . . ? 
B5 Re Ag 87.21(15) . . ? 
B3 Re Ag 75.21(16) . . ? 
B4 Re Ag 53.16(15) . . ? 
O3 C3 Re 178.1(5) . . y 
O4 C4 Re 177.2(5) . . y 
O5 C5 Re 177.3(5) . . y 
C2 C1 B5 112.9(4) . . ? 
C2 C1 B6 111.2(4) . . ? 
B5 C1 B6 64.0(4) . . ? 
C2 C1 B7 61.8(4) . . ? 
B5 C1 B7 114.9(4) . . ? 
B6 C1 B7 61.1(4) . . ? 
C2 C1 Re 70.1(3) . . ? 
B5 C1 Re 70.4(3) . . ? 
B6 C1 Re 130.7(4) . . ? 
B7 C1 Re 129.6(4) . . ? 
C1 C2 B3 111.4(4) . . ? 
C1 C2 B8 111.0(5) . . ? 
B3 C2 B8 63.1(4) . . ? 
C1 C2 B7 62.3(4) . . ? 
B3 C2 B7 114.3(4) . . ? 
B8 C2 B7 61.4(4) . . ? 
C1 C2 Re 68.7(3) . . ? 
B3 C2 Re 70.3(3) . . ? 
B8 C2 Re 129.5(4) . . ? 
B7 C2 Re 128.7(4) . . ? 
C2 B3 B9 103.8(5) . . ? 
C2 B3 B8 58.8(4) . . ? 
B9 B3 B8 59.0(4) . . ? 
C2 B3 B4 104.9(4) . . ? 
B9 B3 B4 59.6(4) . . ? 
B8 B3 B4 107.1(5) . . ? 
C2 B3 Re 67.0(3) . . ? 
B9 B3 Re 122.9(4) . . ? 
B8 B3 Re 122.4(4) . . ? 
B4 B3 Re 68.6(3) . . ? 
B10 B4 B9 60.2(4) . . ? 
B10 B4 B5 59.7(3) . . ? 
B9 B4 B5 106.9(4) . . ? 
B10 B4 B3 106.6(5) . . ? 
B9 B4 B3 59.2(4) . . ? 
B5 B4 B3 105.3(4) . . ? 
B10 B4 Re 120.4(4) . . ? 
B9 B4 Re 120.5(4) . . ? 
B5 B4 Re 65.7(3) . . ? 
B3 B4 Re 66.4(3) . . ? 
B10 B4 Ag 153.6(4) . . ? 
B9 B4 Ag 133.9(4) . . ? 
B5 B4 Ag 118.5(4) . . ? 
B3 B4 Ag 99.2(3) . . ? 
Re B4 Ag 74.85(18) . . ? 
C1 B5 B10 104.0(4) . . ? 
C1 B5 B6 59.0(4) . . ? 
B10 B5 B6 59.4(4) . . ? 
C1 B5 B4 105.4(4) . . ? 
B10 B5 B4 58.8(3) . . ? 
B6 B5 B4 107.3(5) . . ? 
C1 B5 Re 67.3(3) . . ? 
B10 B5 Re 123.0(4) . . ? 
B6 B5 Re 123.1(4) . . ? 
B4 B5 Re 69.4(3) . . ? 
C1 B6 B7 60.1(4) . . ? 
C1 B6 B10 103.0(4) . . ? 
B7 B6 B10 107.7(5) . . ? 
C1 B6 B11 105.0(5) . . ? 
B7 B6 B11 59.7(4) . . ? 
B10 B6 B11 60.2(4) . . ? 
C1 B6 B5 57.0(3) . . ? 
B7 B6 B5 108.3(5) . . ? 
B10 B6 B5 60.1(4) . . ? 
B11 B6 B5 108.6(5) . . ? 
C2 B7 C1 55.9(3) . . ? 
C2 B7 B6 104.5(5) . . ? 
C1 B7 B6 58.8(4) . . ? 
C2 B7 B11 105.1(5) . . ? 
C1 B7 B11 105.0(5) . . ? 
B6 B7 B11 61.0(4) . . ? 
C2 B7 B8 59.0(4) . . ? 
C1 B7 B8 103.9(5) . . ? 
B6 B7 B8 108.9(5) . . ? 
B11 B7 B8 60.2(4) . . ? 
C2 B8 B7 59.5(4) . . ? 
C2 B8 B9 104.5(5) . . ? 
B7 B8 B9 108.1(5) . . ? 
C2 B8 B11 105.3(5) . . ? 
B7 B8 B11 59.9(4) . . ? 
B9 B8 B11 60.3(4) . . ? 
C2 B8 B3 58.1(3) . . ? 
B7 B8 B3 108.6(5) . . ? 
B9 B8 B3 60.4(4) . . ? 
B11 B8 B3 109.0(5) . . ? 
B8 B9 B11 59.9(4) . . ? 
B8 B9 B10 107.5(5) . . ? 
B11 B9 B10 60.2(4) . . ? 
B8 B9 B3 60.6(4) . . ? 
B11 B9 B3 108.8(4) . . ? 
B10 B9 B3 107.5(4) . . ? 
B8 B9 B4 109.9(4) . . ? 
B11 B9 B4 109.0(4) . . ? 
B10 B9 B4 59.2(4) . . ? 
B3 B9 B4 61.3(4) . . ? 
B4 B10 B6 110.5(4) . . ? 
B4 B10 B11 109.7(5) . . ? 
B6 B10 B11 60.1(4) . . ? 
B4 B10 B5 61.5(3) . . ? 
B6 B10 B5 60.6(4) . . ? 
B11 B10 B5 108.9(4) . . ? 
B4 B10 B9 60.7(4) . . ? 
B6 B10 B9 107.7(5) . . ? 
B11 B10 B9 59.5(4) . . ? 
B5 B10 B9 108.7(4) . . ? 
B7 B11 B8 59.9(4) . . ? 
B7 B11 B9 107.7(5) . . ? 
B8 B11 B9 59.8(4) . . ? 
B7 B11 B6 59.3(4) . . ? 
B8 B11 B6 107.3(5) . . ? 
B9 B11 B6 108.1(5) . . ? 
B7 B11 B10 106.9(5) . . ? 
B8 B11 B10 107.5(5) . . ? 
B9 B11 B10 60.3(4) . . ? 
B6 B11 B10 59.7(4) . . ? 
H4 Ag P 146.1(15) . . y 
H4 Ag B4 25.7(15) . . ? 
P Ag B4 157.17(16) . . y 
H4 Ag Re 77.1(15) . . ? 
P Ag Re 129.93(4) . . y 
B4 Ag Re 52.00(14) . . ? 
C21 P C11 106.4(2) . . ? 
C21 P C6 105.7(2) . . ? 
C11 P C6 102.5(2) . . ? 
C21 P Ag 110.95(18) . . ? 
C11 P Ag 120.27(17) . . ? 
C6 P Ag 109.94(17) . . ? 
C6 C6 P 111.7(5) 5_567 . ? 
C12 C11 C16 119.1(5) . . ? 
C12 C11 P 119.0(4) . . ? 
C16 C11 P 121.7(4) . . ? 
C11 C12 C13 121.3(5) . . ? 
C14 C13 C12 119.7(6) . . ? 
C15 C14 C13 120.0(6) . . ? 
C14 C15 C16 120.1(6) . . ? 
C15 C16 C11 119.9(5) . . ? 
C22 C21 C26 119.1(5) . . ? 
C22 C21 P 123.7(4) . . ? 
C26 C21 P 117.2(4) . . ? 
C21 C22 C23 120.3(5) . . ? 
C24 C23 C22 119.7(6) . . ? 
C23 C24 C25 120.4(5) . . ? 
C26 C25 C24 120.5(6) . . ? 
C25 C26 C21 119.9(6) . . ? 
Cl3 C41 Cl3 51(3) 2_556 . ? 
Cl3 Cl3 C41 64.7(13) 2_556 . ? 
Cl2 C40 Cl1 99(2) . . ? 
 
_diffrn_measured_fraction_theta_max    0.426 
_diffrn_reflns_theta_full              25.00 
_diffrn_measured_fraction_theta_full   0.426 
_refine_diff_density_max    1.755 
_refine_diff_density_min   -0.639 
_refine_diff_density_rms    0.106 

#===END
 
data_4 

_audit_creation_method            SHELXL-97 
_chemical_name_systematic 
; 
 ? 
; 

_chemical_name_common             ? 
_chemical_melting_point           ? 
_chemical_formula_moiety          ? 
_chemical_formula_sum            'C12 H19 Ag B9 N4 O3 Re' 
_chemical_formula_weight          658.67 
 
loop_ 
 _atom_type_symbol 
 _atom_type_description 
 _atom_type_scat_dispersion_real 
 _atom_type_scat_dispersion_imag 
 _atom_type_scat_source 
 'C'  'C'   0.0033   0.0016 
 'International Tables Vol C Tables 4.2.6.8 and 6.1.1.4' 
 'H'  'H'   0.0000   0.0000 
 'International Tables Vol C Tables 4.2.6.8 and 6.1.1.4' 
 'B'  'B'   0.0013   0.0007 
 'International Tables Vol C Tables 4.2.6.8 and 6.1.1.4' 
 'N'  'N'   0.0061   0.0033 
 'International Tables Vol C Tables 4.2.6.8 and 6.1.1.4' 
 'O'  'O'   0.0106   0.0060 
 'International Tables Vol C Tables 4.2.6.8 and 6.1.1.4' 
 'Ag'  'Ag'  -0.8971   1.1015 
 'International Tables Vol C Tables 4.2.6.8 and 6.1.1.4' 
 'Re'  'Re'  -1.0185   7.2310 
 'International Tables Vol C Tables 4.2.6.8 and 6.1.1.4' 

 _symmetry_cell_setting            Triclinic 
_symmetry_space_group_name_H-M    P-1 
_symmetry_space_group_name_Hall   '-P 1' 

 loop_ 
 _symmetry_equiv_pos_as_xyz 
 'x, y, z' 
 '-x, -y, -z' 
 
_cell_length_a                    7.0107(6) 
_cell_length_b                    12.431(3) 
_cell_length_c                    12.5833(19) 
_cell_angle_alpha                 83.311(14) 
_cell_angle_beta                  77.730(16) 
_cell_angle_gamma                 83.604(17) 
_cell_volume                      1060.0(3) 
_cell_formula_units_Z             2 
_cell_measurement_temperature     293(2) 
_cell_measurement_reflns_used     25 
_cell_measurement_theta_min       18 
_cell_measurement_theta_max       24 
 _exptl_crystal_description        prisms 
_exptl_crystal_colour             colorless 
_exptl_crystal_size_max           0.40 
_exptl_crystal_size_mid           0.40 
_exptl_crystal_size_min           0.25 
_exptl_crystal_density_meas       ? 
_exptl_crystal_density_diffrn     2.064 
_exptl_crystal_density_method     'not measured' 
_exptl_crystal_F_000              620 
_exptl_absorpt_coefficient_mu     6.650 
_exptl_absorpt_correction_type    'Semi-empirical based on \y scans' 
_exptl_absorpt_correction_T_min   0.10 
_exptl_absorpt_correction_T_max   0.06
_exptl_absorpt_process_details    'applied with XPREP vs 5.03' 
 _exptl_special_details 

; 
 ? 
; 
 
_diffrn_ambient_temperature       293(2) 
_diffrn_radiation_wavelength      0.71073 
_diffrn_radiation_type            MoK\a 
_diffrn_radiation_source          'fine-focus sealed tube' 
_diffrn_radiation_monochromator   graphite 
_diffrn_measurement_device_type   'Enraf-Nonius CAD4' 
_diffrn_measurement_method        \w-2\q 
_diffrn_detector_area_resol_mean  ? 
_diffrn_standards_number          3 
_diffrn_standards_interval_count  ? 
_diffrn_standards_interval_time   120 
_diffrn_standards_decay_%         4.14 
_diffrn_reflns_number             4056 
_diffrn_reflns_av_R_equivalents   0.0161 
_diffrn_reflns_av_sigmaI/netI     0.0194 
_diffrn_reflns_limit_h_min        0 
_diffrn_reflns_limit_h_max        8 
_diffrn_reflns_limit_k_min        -14 
_diffrn_reflns_limit_k_max        14 
_diffrn_reflns_limit_l_min        -14 
_diffrn_reflns_limit_l_max        14 
_diffrn_reflns_theta_min          1.66 
_diffrn_reflns_theta_max          24.99 
_reflns_number_total              3721 
_reflns_number_gt                 3471 
_reflns_threshold_expression      >2sigma(I) 

 _computing_data_collection        'Enraf-Nonius CAD4 (1989)' 
_computing_cell_refinement        'Enraf-Nonius CAD4 (1989)' 
_computing_data_reduction         'XCAD4 Siemens Software (Harms, 1993)'
_computing_structure_solution     'SHELXS-97 (Sheldrick, 1997)' 
_computing_structure_refinement   'SHELXL-97 (Sheldrick, 1997)' 
_computing_molecular_graphics     'XP in SHELXTL-PC (Bruker, 1995)' 
_computing_publication_material   'SHELXL-97 (Sheldrick, 1997)' 
 _refine_special_details 

; 
 Refinement of F^2^ against ALL reflections.  The weighted R-factor wR and 
goodness of fit S are based on F^2^, conventional R-factors R are based 
on F, with F set to zero for negative F^2^. The threshold expression of 
F^2^ > 2sigma(F^2^) is used only for calculating R-factors(gt) etc. and is 
not relevant to the choice of reflections for refinement.  R-factors based 
on F^2^ are statistically about twice as large as those based on F, and R- 
factors based on ALL data will be even larger. 
; 

_refine_ls_structure_factor_coef  Fsqd  
_refine_ls_matrix_type            full 
_refine_ls_weighting_scheme       calc  
_refine_ls_weighting_details 
;
calc w=1/[\s^2^(Fo^2^)+(0.0435P)^2^+0.0143P] where
P=(Fo^2^+2Fc^2^)/3
;
_atom_sites_solution_primary      direct 
_atom_sites_solution_secondary    difmap 
_atom_sites_solution_hydrogens    geom 
_refine_ls_hydrogen_treatment     mixed 
_refine_ls_extinction_method      SHELXL 
_refine_ls_extinction_coef        0.0244(7) 
_refine_ls_extinction_expression 
;
Fc^*^=kFc[1+0.001xFc^2^\l^3^/sin(2\q)]^-1/4^
; 
_refine_ls_number_reflns          3721 
_refine_ls_number_parameters      276 
_refine_ls_number_restraints      0 
_refine_ls_R_factor_all           0.0286 
_refine_ls_R_factor_gt            0.0256 
_refine_ls_wR_factor_ref          0.0643 
_refine_ls_wR_factor_gt           0.0629 
_refine_ls_goodness_of_fit_ref    1.123 
_refine_ls_restrained_S_all       1.123 
_refine_ls_shift/su_max           0.001 
_refine_ls_shift/su_mean          0.000 

loop_ 
_atom_site_label 
_atom_site_type_symbol 
_atom_site_fract_x 
_atom_site_fract_y 
_atom_site_fract_z 
_atom_site_U_iso_or_equiv 
_atom_site_adp_type 
_atom_site_occupancy 
_atom_site_symetry_multiplicity 
_atom_site_calc_flag 
_atom_site_refinement_flags 
_atom_site_disorder_assembly 
_atom_site_disorder_group 
Re Re 0.21337(3) 0.193554(13) 0.379230(13) 0.03205(10) Uani 1 1 d . . . 
C1 C 0.3776(7) 0.0687(4) 0.2638(4) 0.0398(10) Uani 1 1 d . . . 
H1 H 0.5227 0.0582 0.2858 0.048 Uiso 1 1 calc R . . 
C2 C 0.1877(7) 0.0183(4) 0.3443(4) 0.0374(10) Uani 1 1 d . . . 
H2 H 0.1966 -0.0274 0.4237 0.045 Uiso 1 1 calc R . . 
B3 B -0.0215(8) 0.0948(4) 0.3323(4) 0.0374(11) Uani 1 1 d . . . 
H3 H -0.1530 0.1027 0.3975 0.045 Uiso 1 1 calc R . . 
B4 B 0.0463(8) 0.2036(4) 0.2300(4) 0.0397(12) Uani 1 1 d . . . 
H4 H -0.051(8) 0.280(4) 0.204(4) 0.048 Uiso 1 1 d . . . 
B5 B 0.3126(8) 0.1852(5) 0.1900(4) 0.0397(12) Uani 1 1 d . . . 
H5 H 0.4038 0.2532 0.1597 0.048 Uiso 1 1 calc R . . 
B6 B 0.3001(9) -0.0467(5) 0.2306(5) 0.0500(15) Uani 1 1 d . . . 
H6 H 0.3823 -0.1274 0.2319 0.060 Uiso 1 1 calc R . . 
B7 B 0.0430(9) -0.0292(5) 0.2714(5) 0.0457(13) Uani 1 1 d . . . 
H7 H -0.0432 -0.0996 0.2992 0.055 Uiso 1 1 calc R . . 
B8 B -0.0429(8) 0.0874(5) 0.1951(4) 0.0416(12) Uani 1 1 d . . . 
H8 H -0.1864 0.0933 0.1716 0.050 Uiso 1 1 calc R . . 
B9 B 0.1626(9) 0.1432(5) 0.1080(4) 0.0436(13) Uani 1 1 d . . . 
H9 H 0.1549 0.1862 0.0273 0.052 Uiso 1 1 calc R . . 
B10 B 0.3740(9) 0.0603(5) 0.1309(5) 0.0484(14) Uani 1 1 d . . . 
H10 H 0.5053 0.0488 0.0663 0.058 Uiso 1 1 calc R . . 
B11 B 0.1546(9) 0.0003(5) 0.1327(5) 0.0466(13) Uani 1 1 d . . . 
H11 H 0.1400 -0.0497 0.0687 0.056 Uiso 1 1 calc R . . 
C3 C 0.3420(7) 0.1368(4) 0.4974(4) 0.0417(11) Uani 1 1 d . . . 
O3 O 0.4249(6) 0.1013(3) 0.5648(3) 0.0596(10) Uani 1 1 d . . . 
C4 C 0.3803(9) 0.3077(5) 0.3644(4) 0.0519(13) Uani 1 1 d . . . 
O4 O 0.4870(9) 0.3733(5) 0.3556(4) 0.102(2) Uani 1 1 d . . . 
C5 C 0.0058(8) 0.2603(4) 0.4832(4) 0.0464(12) Uani 1 1 d . . . 
O5 O -0.1252(7) 0.2952(4) 0.5439(4) 0.0720(12) Uani 1 1 d . . . 
Ag Ag 0.07715(8) 0.39386(3) 0.26766(4) 0.06721(15) Uani 1 1 d . . . 
N11 N -0.0529(7) 0.6452(3) 0.2437(4) 0.0526(11) Uani 1 1 d . . . 
N12 N -0.0853(8) 0.5561(4) 0.3147(4) 0.0604(13) Uani 1 1 d . . . 
C13 C -0.2715(11) 0.5702(5) 0.3615(6) 0.0730(19) Uani 1 1 d . . . 
H13A H -0.3369 0.5210 0.4144 0.088 Uiso 1 1 calc R . . 
C14 C -0.3573(11) 0.6681(6) 0.3215(6) 0.0756(19) Uani 1 1 d . . . 
H14A H -0.4869 0.6963 0.3416 0.091 Uiso 1 1 calc R . . 
C15 C -0.2136(10) 0.7136(5) 0.2474(6) 0.0631(16) Uani 1 1 d . . . 
H15A H -0.2245 0.7804 0.2064 0.076 Uiso 1 1 calc R . . 
N21 N 0.1942(7) 0.5980(3) 0.0885(4) 0.0505(11) Uani 1 1 d . . . 
N22 N 0.2196(7) 0.4884(4) 0.1025(4) 0.0520(11) Uani 1 1 d . . . 
C23 C 0.2643(9) 0.4575(5) 0.0037(5) 0.0600(15) Uani 1 1 d . . . 
H23A H 0.2866 0.3852 -0.0116 0.072 Uiso 1 1 calc R . . 
C24 C 0.2744(9) 0.5449(6) -0.0755(6) 0.0682(18) Uani 1 1 d . . . 
H24A H 0.3060 0.5432 -0.1509 0.082 Uiso 1 1 calc R . . 
C25 C 0.2285(8) 0.6328(5) -0.0190(5) 0.0612(16) Uani 1 1 d . . . 
H25A H 0.2217 0.7049 -0.0487 0.073 Uiso 1 1 calc R . . 
C30 C 0.1455(9) 0.6582(5) 0.1823(5) 0.0599(15) Uani 1 1 d . . . 
H30A H 0.1584 0.7347 0.1590 0.072 Uiso 1 1 calc R . . 
H30B H 0.2375 0.6341 0.2297 0.072 Uiso 1 1 calc R . . 

loop_ 
_atom_site_aniso_label 
_atom_site_aniso_U_11 
_atom_site_aniso_U_22 
_atom_site_aniso_U_33 
_atom_site_aniso_U_23 
_atom_site_aniso_U_13 
_atom_site_aniso_U_12 
Re 0.03708(13) 0.03095(12) 0.02872(12) -0.00187(7) -0.00817(7) -0.00365(7) 
C1 0.033(2) 0.052(3) 0.036(2) -0.012(2) -0.0077(19) -0.001(2) 
C2 0.051(3) 0.032(2) 0.029(2) -0.0010(18) -0.009(2) -0.005(2) 
B3 0.035(3) 0.043(3) 0.033(3) -0.001(2) -0.004(2) -0.008(2) 
B4 0.043(3) 0.040(3) 0.037(3) 0.002(2) -0.015(2) 0.001(2) 
B5 0.043(3) 0.046(3) 0.029(3) 0.000(2) -0.001(2) -0.016(2) 
B6 0.053(4) 0.044(3) 0.058(4) -0.022(3) -0.020(3) 0.007(3) 
B7 0.057(4) 0.040(3) 0.044(3) -0.007(2) -0.013(3) -0.014(3) 
B8 0.039(3) 0.051(3) 0.038(3) -0.006(2) -0.012(2) -0.009(2) 
B9 0.049(3) 0.053(3) 0.031(3) 0.002(2) -0.011(2) -0.013(3) 
B10 0.043(3) 0.069(4) 0.034(3) -0.017(3) -0.003(2) -0.007(3) 
B11 0.051(3) 0.052(3) 0.041(3) -0.013(3) -0.012(3) -0.008(3) 
C3 0.044(3) 0.040(2) 0.045(3) -0.013(2) -0.013(2) -0.001(2) 
O3 0.066(3) 0.066(2) 0.053(2) -0.0114(19) -0.032(2) 0.012(2) 
C4 0.061(3) 0.059(3) 0.040(3) -0.001(2) -0.014(2) -0.016(3) 
O4 0.135(5) 0.102(4) 0.085(4) -0.004(3) -0.020(3) -0.085(4) 
C5 0.052(3) 0.045(3) 0.041(3) -0.005(2) -0.008(2) 0.002(2) 
O5 0.067(3) 0.081(3) 0.060(3) -0.023(2) 0.005(2) 0.012(2) 
Ag 0.0936(4) 0.0349(2) 0.0657(3) 0.00767(19) -0.0110(3) 0.0035(2) 
N11 0.063(3) 0.034(2) 0.063(3) -0.005(2) -0.015(2) -0.007(2) 
N12 0.078(4) 0.036(2) 0.064(3) -0.007(2) -0.006(3) -0.006(2) 
C13 0.082(5) 0.059(4) 0.076(4) -0.033(3) 0.010(4) -0.023(3) 
C14 0.067(4) 0.065(4) 0.099(5) -0.033(4) -0.016(4) 0.004(3) 
C15 0.072(4) 0.045(3) 0.077(4) -0.016(3) -0.025(3) 0.004(3) 
N21 0.048(2) 0.043(2) 0.058(3) 0.010(2) -0.010(2) -0.0072(19) 
N22 0.054(3) 0.045(2) 0.054(3) 0.006(2) -0.007(2) -0.009(2) 
C23 0.053(3) 0.066(4) 0.058(4) -0.003(3) -0.007(3) 0.000(3) 
C24 0.048(3) 0.096(5) 0.056(4) 0.012(3) -0.014(3) 0.000(3) 
C25 0.048(3) 0.066(4) 0.061(4) 0.022(3) -0.011(3) -0.002(3) 
C30 0.064(4) 0.044(3) 0.075(4) 0.002(3) -0.019(3) -0.016(3) 
_geom_special_details 

; 
 All esds (except the esd in the dihedral angle between two l.s. planes) 
 are estimated using the full covariance matrix.  The cell esds are taken 
 into account individually in the estimation of esds in distances, angles 
 and torsion angles; correlations between esds in cell parameters are only 
 used when they are defined by crystal symmetry.  An approximate (isotropic) 
 treatment of cell esds is used for estimating esds involving l.s. planes. 
; 
 
loop_ 
 _geom_bond_atom_site_label_1 
 _geom_bond_atom_site_label_2 
 _geom_bond_distance 
 _geom_bond_site_symmetry_2 
 _geom_bond_publ_flag 
Re C4 1.906(5) . y 
Re C5 1.922(5) . y 
Re C3 1.925(5) . y 
Re C1 2.294(5) . y 
Re C2 2.305(4) . y 
Re B5 2.345(5) . y 
Re B3 2.366(5) . y 
Re B4 2.401(5) . y 
Re Ag 2.8825(7) . y 
C1 C2 1.630(7) . ? 
C1 B10 1.693(7) . ? 
C1 B5 1.699(7) . ? 
C1 B6 1.714(7) . ? 
C2 B3 1.682(7) . ? 
C2 B7 1.696(7) . ? 
C2 B6 1.724(7) . ? 
B3 B7 1.772(8) . ? 
B3 B8 1.778(7) . ? 
B3 B4 1.786(7) . ? 
B4 B8 1.771(8) . ? 
B4 B9 1.785(8) . ? 
B4 B5 1.823(8) . ? 
B4 Ag 2.507(6) . y 
B5 B10 1.770(8) . ? 
B5 B9 1.776(7) . ? 
B6 B10 1.760(9) . ? 
B6 B7 1.762(9) . ? 
B6 B11 1.770(9) . ? 
B7 B8 1.764(8) . ? 
B7 B11 1.769(8) . ? 
B8 B11 1.763(8) . ? 
B8 B9 1.770(8) . ? 
B9 B10 1.764(9) . ? 
B9 B11 1.773(8) . ? 
B10 B11 1.778(8) . ? 
C3 O3 1.148(6) . y 
C4 O4 1.147(7) . y 
C5 O5 1.142(6) . y 
Ag H4 2.07(5) . y 
Ag N12 2.279(5) . y 
Ag N22 2.347(4) . y 
N11 C15 1.329(7) . ? 
N11 N12 1.347(6) . ? 
N11 C30 1.457(7) . ? 
N12 C13 1.315(8) . ? 
C13 C14 1.385(10) . ? 
C14 C15 1.345(10) . ? 
N21 C25 1.350(7) . ? 
N21 N22 1.351(6) . ? 
N21 C30 1.430(8) . ? 
N22 C23 1.308(8) . ? 
C23 C24 1.383(9) . ? 
C24 C25 1.346(9) . ? 

loop_ 
 _geom_angle_atom_site_label_1 
 _geom_angle_atom_site_label_2 
 _geom_angle_atom_site_label_3 
 _geom_angle 
 _geom_angle_site_symmetry_1 
 _geom_angle_site_symmetry_3 
 _geom_angle_publ_flag 
C4 Re C5 94.8(2) . . y 
C4 Re C3 83.4(2) . . y 
C5 Re C3 88.9(2) . . y 
C4 Re C1 106.2(2) . . y 
C5 Re C1 159.0(2) . . y 
C3 Re C1 94.38(18) . . y 
C4 Re C2 146.4(2) . . y 
C5 Re C2 117.9(2) . . y 
C3 Re C2 89.57(18) . . y 
C1 Re C2 41.51(17) . . ? 
C4 Re B5 87.5(2) . . y 
C5 Re B5 139.9(2) . . y 
C3 Re B5 131.0(2) . . y 
C1 Re B5 42.95(18) . . ? 
C2 Re B5 72.62(17) . . ? 
C4 Re B3 156.3(2) . . y 
C5 Re B3 88.3(2) . . y 
C3 Re B3 120.2(2) . . y 
C1 Re B3 72.05(18) . . ? 
C2 Re B3 42.18(18) . . ? 
B5 Re B3 75.34(18) . . ? 
C4 Re B4 112.4(2) . . y 
C5 Re B4 98.5(2) . . y 
C3 Re B4 161.68(19) . . y 
C1 Re B4 72.85(18) . . ? 
C2 Re B4 72.15(17) . . ? 
B5 Re B4 45.17(19) . . ? 
B3 Re B4 44.00(18) . . ? 
C4 Re Ag 65.78(17) . . y 
C5 Re Ag 73.87(15) . . y 
C3 Re Ag 142.53(14) . . y 
C1 Re Ag 113.69(13) . . y 
C2 Re Ag 127.90(11) . . y 
B5 Re Ag 70.78(14) . . y 
B3 Re Ag 92.85(13) . . y 
B4 Re Ag 55.75(13) . . y 
C2 C1 B10 111.3(4) . . ? 
C2 C1 B5 111.6(4) . . ? 
B10 C1 B5 62.9(3) . . ? 
C2 C1 B6 62.0(3) . . ? 
B10 C1 B6 62.2(4) . . ? 
B5 C1 B6 114.9(4) . . ? 
C2 C1 Re 69.6(2) . . ? 
B10 C1 Re 129.5(3) . . ? 
B5 C1 Re 70.1(2) . . ? 
B6 C1 Re 129.5(3) . . ? 
C1 C2 B3 111.7(3) . . ? 
C1 C2 B7 110.9(4) . . ? 
B3 C2 B7 63.3(3) . . ? 
C1 C2 B6 61.4(3) . . ? 
B3 C2 B6 114.8(4) . . ? 
B7 C2 B6 62.0(3) . . ? 
C1 C2 Re 68.9(2) . . ? 
B3 C2 Re 70.8(2) . . ? 
B7 C2 Re 130.2(3) . . ? 
B6 C2 Re 128.2(3) . . ? 
C2 B3 B7 58.7(3) . . ? 
C2 B3 B8 104.4(4) . . ? 
B7 B3 B8 59.6(3) . . ? 
C2 B3 B4 106.1(4) . . ? 
B7 B3 B4 108.2(4) . . ? 
B8 B3 B4 59.6(3) . . ? 
C2 B3 Re 67.0(2) . . ? 
B7 B3 Re 122.4(3) . . ? 
B8 B3 Re 123.1(3) . . ? 
B4 B3 Re 69.0(2) . . ? 
B8 B4 B9 59.7(3) . . ? 
B8 B4 B3 60.0(3) . . ? 
B9 B4 B3 106.8(4) . . ? 
B8 B4 B5 106.4(4) . . ? 
B9 B4 B5 59.0(3) . . ? 
B3 B4 B5 105.8(4) . . ? 
B8 B4 Re 121.5(3) . . ? 
B9 B4 Re 120.0(3) . . ? 
B3 B4 Re 67.0(2) . . ? 
B5 B4 Re 65.8(2) . . ? 
B8 B4 Ag 162.9(4) . . y 
B9 B4 Ag 125.3(3) . . y 
B3 B4 Ag 124.8(3) . . y 
B5 B4 Ag 88.4(3) . . y 
Re B4 Ag 71.91(16) . . y 
C1 B5 B10 58.4(3) . . ? 
C1 B5 B9 103.9(4) . . ? 
B10 B5 B9 59.7(3) . . ? 
C1 B5 B4 104.6(4) . . ? 
B10 B5 B4 107.4(4) . . ? 
B9 B5 B4 59.4(3) . . ? 
C1 B5 Re 66.9(2) . . ? 
B10 B5 Re 122.3(3) . . ? 
B9 B5 Re 123.3(3) . . ? 
B4 B5 Re 69.0(2) . . ? 
C1 B6 C2 56.6(3) . . ? 
C1 B6 B10 58.3(3) . . ? 
C2 B6 B10 103.8(4) . . ? 
C1 B6 B7 104.0(4) . . ? 
C2 B6 B7 58.2(3) . . ? 
B10 B6 B7 108.0(4) . . ? 
C1 B6 B11 104.7(4) . . ? 
C2 B6 B11 104.3(4) . . ? 
B10 B6 B11 60.5(4) . . ? 
B7 B6 B11 60.1(3) . . ? 
C2 B7 B6 59.8(3) . . ? 
C2 B7 B8 104.5(4) . . ? 
B6 B7 B8 108.1(4) . . ? 
C2 B7 B11 105.5(4) . . ? 
B6 B7 B11 60.2(4) . . ? 
B8 B7 B11 59.9(3) . . ? 
C2 B7 B3 58.0(3) . . ? 
B6 B7 B3 108.5(4) . . ? 
B8 B7 B3 60.4(3) . . ? 
B11 B7 B3 108.5(4) . . ? 
B11 B8 B7 60.2(3) . . ? 
B11 B8 B9 60.2(3) . . ? 
B7 B8 B9 107.9(4) . . ? 
B11 B8 B4 109.8(4) . . ? 
B7 B8 B4 109.2(4) . . ? 
B9 B8 B4 60.5(3) . . ? 
B11 B8 B3 108.5(4) . . ? 
B7 B8 B3 60.1(3) . . ? 
B9 B8 B3 107.8(4) . . ? 
B4 B8 B3 60.4(3) . . ? 
B10 B9 B8 107.7(4) . . ? 
B10 B9 B11 60.4(3) . . ? 
B8 B9 B11 59.7(3) . . ? 
B10 B9 B5 60.0(3) . . ? 
B8 B9 B5 108.5(4) . . ? 
B11 B9 B5 108.8(4) . . ? 
B10 B9 B4 109.4(4) . . ? 
B8 B9 B4 59.8(3) . . ? 
B11 B9 B4 108.8(4) . . ? 
B5 B9 B4 61.6(3) . . ? 
C1 B10 B6 59.5(3) . . ? 
C1 B10 B9 104.7(4) . . ? 
B6 B10 B9 108.3(4) . . ? 
C1 B10 B5 58.7(3) . . ? 
B6 B10 B5 109.1(4) . . ? 
B9 B10 B5 60.3(3) . . ? 
C1 B10 B11 105.2(4) . . ? 
B6 B10 B11 60.0(3) . . ? 
B9 B10 B11 60.1(3) . . ? 
B5 B10 B11 108.9(4) . . ? 
B8 B11 B7 59.9(3) . . ? 
B8 B11 B6 107.8(4) . . ? 
B7 B11 B6 59.7(4) . . ? 
B8 B11 B9 60.1(3) . . ? 
B7 B11 B9 107.6(4) . . ? 
B6 B11 B9 107.5(4) . . ? 
B8 B11 B10 107.4(4) . . ? 
B7 B11 B10 106.9(4) . . ? 
B6 B11 B10 59.5(4) . . ? 
B9 B11 B10 59.6(3) . . ? 
O3 C3 Re 177.3(5) . . y 
O4 C4 Re 177.2(6) . . y 
O5 C5 Re 175.5(5) . . y 
H4 Ag N12 122.5(15) . . y 
H4 Ag N22 98.4(15) . . y 
N12 Ag N22 86.81(17) . . y 
H4 Ag B4 27.3(14) . . y 
N12 Ag B4 146.05(19) . . y 
N22 Ag B4 107.79(17) . . y 
H4 Ag Re 78.2(15) . . y 
N12 Ag Re 137.06(13) . . y 
N22 Ag Re 130.24(12) . . y 
B4 Ag Re 52.34(12) . . y 
C15 N11 N12 111.6(5) . . ? 
C15 N11 C30 129.5(5) . . ? 
N12 N11 C30 118.7(5) . . ? 
C13 N12 N11 104.8(5) . . ? 
C13 N12 Ag 125.0(4) . . ? 
N11 N12 Ag 118.6(4) . . ? 
N12 C13 C14 110.9(6) . . ? 
C15 C14 C13 105.4(6) . . ? 
N11 C15 C14 107.2(6) . . ? 
C25 N21 N22 110.2(5) . . ? 
C25 N21 C30 130.4(5) . . ? 
N22 N21 C30 119.4(5) . . ? 
C23 N22 N21 105.1(5) . . ? 
C23 N22 Ag 129.8(4) . . ? 
N21 N22 Ag 120.4(3) . . ? 
N22 C23 C24 112.1(6) . . ? 
C25 C24 C23 104.6(6) . . ? 
C24 C25 N21 108.0(5) . . ? 
N21 C30 N11 112.5(5) . . ? 
 _diffrn_measured_fraction_theta_max    0.998 
_diffrn_reflns_theta_full              24.99 
_diffrn_measured_fraction_theta_full   0.998 
_refine_diff_density_max    1.049 
_refine_diff_density_min   -1.101 
_refine_diff_density_rms    0.127 

#===END

data_5 
 
_audit_creation_method            SHELXL-97 
_chemical_name_systematic 
; 
 ? 
; 
_chemical_name_common             ? 
_chemical_melting_point           ? 
_chemical_formula_moiety          ? 
_chemical_formula_sum         'C21 H34 Ag2 B18 Cl2 N6 O6 Re2' 
_chemical_formula_weight          1320.16 
 
loop_ 
 _atom_type_symbol 
 _atom_type_description 
 _atom_type_scat_dispersion_real 
 _atom_type_scat_dispersion_imag 
 _atom_type_scat_source 
 'C'  'C'   0.0033   0.0016 
 'International Tables Vol C Tables 4.2.6.8 and 6.1.1.4' 
 'H'  'H'   0.0000   0.0000 
 'International Tables Vol C Tables 4.2.6.8 and 6.1.1.4' 
 'B'  'B'   0.0013   0.0007 
 'International Tables Vol C Tables 4.2.6.8 and 6.1.1.4' 
 'N'  'N'   0.0061   0.0033 
 'International Tables Vol C Tables 4.2.6.8 and 6.1.1.4' 
 'Ag'  'Ag'  -0.8971   1.1015 
 'International Tables Vol C Tables 4.2.6.8 and 6.1.1.4' 
 'Re'  'Re'  -1.0185   7.2310 
 'International Tables Vol C Tables 4.2.6.8 and 6.1.1.4' 
 'O'  'O'   0.0106   0.0060 
 'International Tables Vol C Tables 4.2.6.8 and 6.1.1.4' 
 'Cl'  'Cl'   0.1484   0.1585 
 'International Tables Vol C Tables 4.2.6.8 and 6.1.1.4' 
 
_symmetry_cell_setting            Monoclinic 
_symmetry_space_group_name_H-M    'C 2/c' 
 
loop_ 
 _symmetry_equiv_pos_as_xyz 
 'x, y, z' 
 '-x, y, -z+1/2' 
 'x+1/2, y+1/2, z' 
 '-x+1/2, y+1/2, -z+1/2' 
 '-x, -y, -z' 
 'x, -y, z-1/2' 
 '-x+1/2, -y+1/2, -z' 
 'x+1/2, -y+1/2, z-1/2' 
 
_cell_length_a                    39.326(7) 
_cell_length_b                    10.5952(14) 
_cell_length_c                    21.378(3) 
_cell_angle_alpha                 90.00 
_cell_angle_beta                  114.572(13) 
_cell_angle_gamma                 90.00 
_cell_volume                      8101(2) 
_cell_formula_units_Z             8 
_cell_measurement_temperature     293(2) 
_cell_measurement_reflns_used     ? 
_cell_measurement_theta_min       ? 
_cell_measurement_theta_max       ? 
 
_exptl_crystal_description        prism 
_exptl_crystal_colour             colorless 
_exptl_crystal_size_max           0.5 
_exptl_crystal_size_mid           0.5 
_exptl_crystal_size_min           0.1 
_exptl_crystal_density_meas       ? 
_exptl_crystal_density_diffrn     2.165 
_exptl_crystal_density_method     'not measured' 
_exptl_crystal_F_000              4944 
_exptl_absorpt_coefficient_mu     7.088 
_exptl_absorpt_correction_type    multi-scan 
_exptl_absorpt_correction_T_min   ? 
_exptl_absorpt_correction_T_max   ? 
_exptl_absorpt_process_details    '(SADABS; Sheldrick, 1997)' 
 
_exptl_special_details 
; 
 ? 
; 
 
_diffrn_ambient_temperature       293(2) 
_diffrn_radiation_wavelength      0.71073 
_diffrn_radiation_type            MoK\a 
_diffrn_radiation_source          'fine-focus sealed tube' 
_diffrn_radiation_monochromator   graphite 
_diffrn_measurement_device_type   'Bruker SMART'
_diffrn_measurement_method        ? 
_diffrn_detector_area_resol_mean  ? 
_diffrn_standards_number          ? 
_diffrn_standards_interval_count  ? 
_diffrn_standards_interval_time   ? 
_diffrn_standards_decay_%         ? 
_diffrn_reflns_number             40370 
_diffrn_reflns_av_R_equivalents   0.0426 
_diffrn_reflns_av_sigmaI/netI     0.0238 
_diffrn_reflns_limit_h_min        -50 
_diffrn_reflns_limit_h_max        50 
_diffrn_reflns_limit_k_min        -13 
_diffrn_reflns_limit_k_max        13 
_diffrn_reflns_limit_l_min        -27 
_diffrn_reflns_limit_l_max        27 
_diffrn_reflns_theta_min          1.92 
_diffrn_reflns_theta_max          27.49 
_reflns_number_total              9211 
_reflns_number_gt                 8550 
_reflns_threshold_expression      >2sigma(I) 
 
_computing_data_collection        ? 
_computing_cell_refinement        ? 
_computing_data_reduction         ? 
_computing_structure_solution     'SHELXS-97 (Sheldrick, 1990)' 
_computing_structure_refinement   'SHELXL-97 (Sheldrick, 1997)' 
_computing_molecular_graphics     ? 
_computing_publication_material   ? 
 
_refine_special_details 
; 
 Refinement of F^2^ against ALL reflections.  The weighted R-factor wR and 
 goodness of fit S are based on F^2^, conventional R-factors R are based 
 on F, with F set to zero for negative F^2^. The threshold expression of 
 F^2^ > 2sigma(F^2^) is used only for calculating R-factors(gt) etc. and is 
 not relevant to the choice of reflections for refinement.  R-factors based 
 on F^2^ are statistically about twice as large as those based on F, and R- 
 factors based on ALL data will be even larger. 
; 
 
_refine_ls_structure_factor_coef  Fsqd  
_refine_ls_matrix_type            full 
_refine_ls_weighting_scheme       calc  
_refine_ls_weighting_details 
 ;
calc w=1/[\s^2^(Fo^2^)+(0.0532P)^2^+39.1872P]
where P=(Fo^2^+2Fc^2^)/3
;
_atom_sites_solution_primary      direct 
_atom_sites_solution_secondary    difmap 
_atom_sites_solution_hydrogens    geom 
_refine_ls_hydrogen_treatment     mixed 
_refine_ls_extinction_method      none 
_refine_ls_extinction_coef        ? 
_refine_ls_number_reflns          9211 
_refine_ls_number_parameters      539 
_refine_ls_number_restraints      5 
_refine_ls_R_factor_all           0.0352 
_refine_ls_R_factor_gt            0.0321 
_refine_ls_wR_factor_ref          0.0844 
_refine_ls_wR_factor_gt           0.0824 
_refine_ls_goodness_of_fit_ref    1.055 
_refine_ls_restrained_S_all       1.061 
_refine_ls_shift/su_max           0.270 
_refine_ls_shift/su_mean          0.010 
 
loop_ 
 _atom_site_label 
 _atom_site_type_symbol 
 _atom_site_fract_x 
 _atom_site_fract_y 
 _atom_site_fract_z 
 _atom_site_U_iso_or_equiv 
 _atom_site_adp_type 
 _atom_site_occupancy 
 _atom_site_symetry_multiplicity 
 _atom_site_calc_flag 
 _atom_site_refinement_flags 
 _atom_site_disorder_assembly 
 _atom_site_disorder_group 
Re1 Re 0.606337(5) 1.312275(17) 0.231966(9) 0.02442(6) Uani 1 1 d . . . 
Ag1 Ag 0.624060(10) 1.18469(3) 0.359321(17) 0.02811(9) Uani 1 1 d D . . 
C11 C 0.6179(2) 1.4603(6) 0.1921(3) 0.063(2) Uani 1 1 d . . . 
O11 O 0.6244(3) 1.5474(6) 0.1673(3) 0.112(3) Uani 1 1 d . . . 
C12 C 0.60372(15) 1.4244(5) 0.3001(3) 0.0352(11) Uani 1 1 d . . . 
O12 O 0.59998(14) 1.4958(4) 0.3381(2) 0.0485(10) Uani 1 1 d . . . 
C13 C 0.65973(15) 1.2904(6) 0.2805(3) 0.0379(12) Uani 1 1 d . . . 
O13 O 0.69152(11) 1.2770(5) 0.3070(2) 0.0506(11) Uani 1 1 d . . . 
C101 C 0.54500(13) 1.2883(5) 0.1525(2) 0.0290(10) Uani 1 1 d . . . 
H101 H 0.5347 1.3861 0.1448 0.035 Uiso 1 1 calc R . . 
C102 C 0.57435(13) 1.2384(5) 0.1223(2) 0.0277(9) Uani 1 1 d . . . 
H102 H 0.5852 1.3011 0.0938 0.033 Uiso 1 1 calc R . . 
B103 B 0.60279(14) 1.1227(5) 0.1711(3) 0.0248(10) Uani 1 1 d . . . 
H103 H 0.6313 1.1021 0.1763 0.030 Uiso 1 1 calc R . . 
B104 B 0.58811(14) 1.0981(5) 0.2406(2) 0.0225(9) Uani 1 1 d D . . 
H104 H 0.6054(14) 1.051(4) 0.2958(18) 0.027 Uiso 1 1 d D . . 
B105 B 0.55131(14) 1.2136(5) 0.2268(3) 0.0236(9) Uani 1 1 d . . . 
H105 H 0.5459 1.2541 0.2692 0.028 Uiso 1 1 calc R . . 
B106 B 0.52734(16) 1.1965(6) 0.0798(3) 0.0316(12) Uani 1 1 d . . . 
H106 H 0.5080 1.2291 0.0284 0.038 Uiso 1 1 calc R . . 
B107 B 0.56383(16) 1.0880(6) 0.0921(3) 0.0301(11) Uani 1 1 d . . . 
H107 H 0.5678 1.0498 0.0478 0.036 Uiso 1 1 calc R . . 
B108 B 0.57172(16) 0.9982(5) 0.1670(3) 0.0283(11) Uani 1 1 d . . . 
H108 H 0.5809 0.8992 0.1716 0.034 Uiso 1 1 calc R . . 
B109 B 0.54003(14) 1.0536(5) 0.2013(3) 0.0264(10) Uani 1 1 d . . . 
H109 H 0.5283 0.9911 0.2285 0.032 Uiso 1 1 calc R . . 
B110 B 0.51329(15) 1.1760(6) 0.1478(3) 0.0292(11) Uani 1 1 d . . . 
H110 H 0.4843 1.1947 0.1402 0.035 Uiso 1 1 calc R . . 
B111 B 0.52547(16) 1.0424(6) 0.1106(3) 0.0309(11) Uani 1 1 d . . . 
H111 H 0.5047 0.9724 0.0793 0.037 Uiso 1 1 calc R . . 
Re2 Re 0.701717(5) 0.568268(15) 0.575818(8) 0.01923(6) Uani 1 1 d . . . 
Ag2 Ag 0.687668(10) 0.78895(3) 0.486007(19) 0.03046(9) Uani 1 1 d D . . 
C21 C 0.68075(13) 0.4099(4) 0.5884(2) 0.0262(9) Uani 1 1 d . . . 
O21 O 0.66972(11) 0.3158(3) 0.5982(2) 0.0358(8) Uani 1 1 d . . . 
C22 C 0.69111(13) 0.5077(4) 0.4844(2) 0.0251(9) Uani 1 1 d . . . 
O22 O 0.68641(12) 0.4668(4) 0.43173(19) 0.0390(8) Uani 1 1 d . . . 
C23 C 0.65187(14) 0.6340(5) 0.5491(2) 0.0296(10) Uani 1 1 d . . . 
O23 O 0.62263(12) 0.6724(5) 0.5376(2) 0.0511(11) Uani 1 1 d . . . 
C201 C 0.73760(12) 0.5863(4) 0.6921(2) 0.0222(8) Uani 1 1 d . . . 
H201 H 0.7199 0.5388 0.7134 0.027 Uiso 1 1 calc R . . 
C202 C 0.76025(12) 0.5084(4) 0.6550(2) 0.0215(8) Uani 1 1 d . . . 
H202 H 0.7587 0.4050 0.6502 0.026 Uiso 1 1 calc R . . 
B203 B 0.76396(14) 0.5946(5) 0.5915(2) 0.0209(9) Uani 1 1 d . . . 
H203 H 0.7651 0.5563 0.5446 0.025 Uiso 1 1 calc R . . 
B204 B 0.74315(13) 0.7463(4) 0.5924(2) 0.0201(9) Uani 1 1 d D . . 
H204 H 0.7354(11) 0.825(4) 0.547(2) 0.024 Uiso 1 1 d D . . 
B205 B 0.72481(15) 0.7320(5) 0.6576(2) 0.0239(10) Uani 1 1 d . . . 
H205 H 0.7002 0.7851 0.6549 0.029 Uiso 1 1 calc R . . 
B206 B 0.76405(16) 0.7091(5) 0.7391(3) 0.0273(10) Uani 1 1 d . . . 
H206 H 0.7638 0.7441 0.7873 0.033 Uiso 1 1 calc R . . 
B207 B 0.78567(16) 0.5645(5) 0.7369(3) 0.0284(11) Uani 1 1 d . . . 
H207 H 0.7991 0.5052 0.7830 0.034 Uiso 1 1 calc R . . 
B208 B 0.80296(15) 0.5732(5) 0.6731(3) 0.0243(10) Uani 1 1 d . . . 
H208 H 0.8279 0.5199 0.6779 0.029 Uiso 1 1 calc R . . 
B209 B 0.79249(14) 0.7251(5) 0.6354(3) 0.0232(9) Uani 1 1 d . . . 
H209 H 0.8112 0.7715 0.6159 0.028 Uiso 1 1 calc R . . 
B210 B 0.76808(15) 0.8105(5) 0.6766(3) 0.0250(10) Uani 1 1 d . . . 
H210 H 0.7705 0.9134 0.6842 0.030 Uiso 1 1 calc R . . 
B211 B 0.80577(15) 0.7078(5) 0.7256(3) 0.0275(10) Uani 1 1 d . . . 
H211 H 0.8325 0.7441 0.7641 0.033 Uiso 1 1 calc R . . 
N31 N 0.60577(11) 1.1528(4) 0.4943(2) 0.0252(8) Uani 1 1 d . . . 
N32 N 0.59835(11) 1.2321(4) 0.4400(2) 0.0278(8) Uani 1 1 d . . . 
C33 C 0.58086(15) 1.3292(5) 0.4524(3) 0.0349(11) Uani 1 1 d . . . 
H33 H 0.5721 1.3987 0.4234 0.042 Uiso 1 1 calc R . . 
C34 C 0.57726(17) 1.3144(5) 0.5142(3) 0.0414(13) Uani 1 1 d . . . 
H34 H 0.5659 1.3699 0.5333 0.050 Uiso 1 1 calc R . . 
C35 C 0.59365(15) 1.2032(5) 0.5405(3) 0.0339(11) Uani 1 1 d . . . 
H35 H 0.5962 1.1676 0.5820 0.041 Uiso 1 1 calc R . . 
N41 N 0.66619(10) 1.0738(3) 0.51213(18) 0.0206(7) Uani 1 1 d . . . 
N42 N 0.67238(10) 1.1347(3) 0.46152(18) 0.0204(7) Uani 1 1 d . . . 
C43 C 0.70889(13) 1.1618(4) 0.4907(2) 0.0257(9) Uani 1 1 d . . . 
H43 H 0.7214 1.2041 0.4683 0.031 Uiso 1 1 calc R . . 
C44 C 0.72604(13) 1.1193(4) 0.5584(2) 0.0265(9) Uani 1 1 d . . . 
H44 H 0.7511 1.1270 0.5886 0.032 Uiso 1 1 calc R . . 
C45 C 0.69798(13) 1.0637(4) 0.5707(2) 0.0263(9) Uani 1 1 d . . . 
H45 H 0.7003 1.0260 0.6116 0.032 Uiso 1 1 calc R . . 
N51 N 0.61093(11) 0.9608(4) 0.44263(19) 0.0229(7) Uani 1 1 d . . . 
N52 N 0.63068(11) 0.8692(4) 0.4282(2) 0.0257(8) Uani 1 1 d . . . 
C53 C 0.60515(15) 0.8053(4) 0.3756(3) 0.0322(11) Uani 1 1 d . . . 
H53 H 0.6105 0.7370 0.3539 0.039 Uiso 1 1 calc R . . 
C54 C 0.56953(14) 0.8543(5) 0.3575(3) 0.0331(11) Uani 1 1 d . . . 
H54 H 0.5473 0.8258 0.3228 0.040 Uiso 1 1 calc R . . 
C55 C 0.57393(13) 0.9527(5) 0.4011(3) 0.0299(10) Uani 1 1 d . . . 
H55 H 0.5551 1.0046 0.4023 0.036 Uiso 1 1 calc R . . 
C60 C 0.62883(12) 1.0425(4) 0.5033(2) 0.0223(8) Uani 1 1 d . . . 
H60 H 0.6302 0.9965 0.5441 0.027 Uiso 1 1 calc R . . 
C10A C 0.4900(3) 0.6919(11) 0.3810(6) 0.096(4) Uani 0.557(14) 1 d P A 1 
H1A H 0.4985 0.7787 0.3859 0.115 Uiso 0.557(14) 1 calc PR A 1 
H2A H 0.4690 0.6855 0.3935 0.115 Uiso 0.557(14) 1 calc PR A 1 
Cl1A Cl 0.5228(3) 0.5976(9) 0.4246(3) 0.116(4) Uani 0.557(14) 1 d PD A 1 
Cl2A Cl 0.4785(4) 0.6328(10) 0.2959(5) 0.194(6) Uani 0.557(14) 1 d PD A 1 
C10B C 0.4900(3) 0.6919(11) 0.3810(6) 0.096(4) Uani 0.44 1 d P A 2 
H1B H 0.4818 0.7609 0.4013 0.115 Uiso 0.443(14) 1 calc PR A 2 
H2B H 0.5100 0.7220 0.3695 0.115 Uiso 0.443(14) 1 calc PR A 2 
Cl1B Cl 0.5056(3) 0.5618(6) 0.4394(5) 0.104(3) Uani 0.443(14) 1 d PD A 2 
Cl2B Cl 0.4537(5) 0.6369(6) 0.3095(6) 0.152(7) Uani 0.443(14) 1 d PD A 2 
 
loop_ 
 _atom_site_aniso_label 
 _atom_site_aniso_U_11 
 _atom_site_aniso_U_22 
 _atom_site_aniso_U_33 
 _atom_site_aniso_U_23 
 _atom_site_aniso_U_13 
 _atom_site_aniso_U_12 
Re1 0.02039(10) 0.02734(10) 0.02125(10) 0.00350(6) 0.00441(7) -0.00545(7) 
Ag1 0.02668(19) 0.03466(19) 0.01880(16) 0.00388(12) 0.00530(14) 0.00104(14) 
C11 0.093(6) 0.046(3) 0.033(3) 0.001(3) 0.011(3) -0.040(4) 
O11 0.180(8) 0.082(4) 0.049(3) 0.007(3) 0.023(4) -0.086(5) 
C12 0.029(3) 0.028(2) 0.038(3) 0.004(2) 0.004(2) -0.002(2) 
O12 0.062(3) 0.0305(19) 0.046(2) -0.0097(17) 0.016(2) 0.0023(19) 
C13 0.028(3) 0.049(3) 0.036(3) -0.009(2) 0.013(2) -0.010(2) 
O13 0.020(2) 0.069(3) 0.058(3) -0.013(2) 0.0109(19) -0.0082(19) 
C101 0.015(2) 0.037(2) 0.029(2) 0.0011(19) 0.0031(18) 0.0000(19) 
C102 0.024(2) 0.040(3) 0.020(2) 0.0049(17) 0.0094(18) -0.0006(19) 
B103 0.016(2) 0.034(3) 0.025(2) 0.0023(19) 0.0087(19) 0.000(2) 
B104 0.018(2) 0.028(2) 0.020(2) 0.0029(18) 0.0064(18) -0.0016(19) 
B105 0.014(2) 0.031(2) 0.025(2) -0.0003(19) 0.0068(19) -0.0017(19) 
B106 0.020(3) 0.045(3) 0.024(2) 0.004(2) 0.003(2) 0.001(2) 
B107 0.024(3) 0.044(3) 0.022(2) -0.002(2) 0.009(2) -0.002(2) 
B108 0.027(3) 0.032(3) 0.024(2) -0.0015(19) 0.009(2) -0.003(2) 
B109 0.017(2) 0.036(3) 0.024(2) 0.0002(19) 0.0065(19) -0.006(2) 
B110 0.013(2) 0.044(3) 0.027(3) 0.000(2) 0.005(2) -0.001(2) 
B111 0.022(3) 0.043(3) 0.024(2) -0.003(2) 0.006(2) -0.006(2) 
Re2 0.01664(9) 0.02041(9) 0.02046(9) 0.00074(5) 0.00752(7) 0.00226(6) 
Ag2 0.02515(19) 0.02965(18) 0.03082(19) 0.00746(13) 0.00590(15) 0.00652(14) 
C21 0.021(2) 0.027(2) 0.026(2) -0.0028(17) 0.0049(18) -0.0008(18) 
O21 0.0281(19) 0.0300(19) 0.045(2) 0.0014(15) 0.0104(17) -0.0063(15) 
C22 0.019(2) 0.031(2) 0.021(2) 0.0014(16) 0.0050(17) 0.0013(17) 
O22 0.043(2) 0.043(2) 0.0275(18) -0.0064(15) 0.0101(16) -0.0008(18) 
C23 0.022(2) 0.035(2) 0.031(2) 0.0042(18) 0.0093(19) 0.0042(19) 
O23 0.027(2) 0.079(3) 0.053(3) 0.019(2) 0.0220(19) 0.022(2) 
C201 0.017(2) 0.028(2) 0.023(2) 0.0005(16) 0.0095(17) -0.0016(16) 
C202 0.019(2) 0.0201(19) 0.025(2) 0.0030(15) 0.0092(17) 0.0038(16) 
B203 0.020(2) 0.024(2) 0.021(2) -0.0014(17) 0.0101(18) 0.0035(18) 
B204 0.017(2) 0.020(2) 0.025(2) 0.0001(16) 0.0095(18) 0.0025(17) 
B205 0.028(3) 0.023(2) 0.022(2) -0.0052(17) 0.011(2) -0.0026(19) 
B206 0.029(3) 0.031(3) 0.022(2) -0.0021(19) 0.011(2) 0.000(2) 
B207 0.023(3) 0.039(3) 0.020(2) 0.0049(19) 0.006(2) 0.000(2) 
B208 0.019(2) 0.028(2) 0.026(2) 0.0009(18) 0.010(2) 0.0031(19) 
B209 0.022(2) 0.026(2) 0.023(2) -0.0004(18) 0.0107(19) -0.0001(19) 
B210 0.024(3) 0.028(2) 0.023(2) -0.0049(18) 0.009(2) -0.0007(19) 
B211 0.021(2) 0.037(3) 0.021(2) -0.0026(19) 0.006(2) 0.000(2) 
N31 0.0207(19) 0.0299(19) 0.0286(19) -0.0042(15) 0.0136(16) -0.0024(16) 
N32 0.0214(19) 0.030(2) 0.033(2) 0.0010(16) 0.0131(17) 0.0060(16) 
C33 0.025(3) 0.030(2) 0.049(3) -0.007(2) 0.015(2) 0.003(2) 
C34 0.034(3) 0.042(3) 0.056(3) -0.020(2) 0.027(3) -0.004(2) 
C35 0.030(3) 0.043(3) 0.037(3) -0.014(2) 0.023(2) -0.010(2) 
N41 0.0170(18) 0.0258(18) 0.0168(16) 0.0001(12) 0.0047(14) -0.0040(14) 
N42 0.0176(17) 0.0241(17) 0.0194(16) 0.0038(13) 0.0076(14) -0.0006(14) 
C43 0.017(2) 0.029(2) 0.032(2) -0.0031(18) 0.0105(18) -0.0044(17) 
C44 0.017(2) 0.031(2) 0.025(2) -0.0068(17) 0.0016(17) -0.0016(18) 
C45 0.026(2) 0.027(2) 0.020(2) -0.0029(16) 0.0044(18) 0.0011(18) 
N51 0.0200(18) 0.0230(17) 0.0259(18) -0.0014(14) 0.0096(15) -0.0011(15) 
N52 0.0212(19) 0.0238(18) 0.0281(19) 0.0016(14) 0.0061(16) 0.0040(15) 
C53 0.032(3) 0.025(2) 0.031(2) -0.0037(17) 0.004(2) -0.0010(19) 
C54 0.022(2) 0.034(2) 0.032(2) 0.0007(19) 0.0002(19) -0.010(2) 
C55 0.013(2) 0.034(2) 0.040(3) 0.001(2) 0.0077(19) -0.0022(18) 
C60 0.020(2) 0.025(2) 0.022(2) 0.0004(16) 0.0086(16) -0.0041(17) 
C10A 0.075(7) 0.101(8) 0.114(9) -0.035(6) 0.040(6) -0.005(6) 
Cl1A 0.095(5) 0.118(5) 0.100(4) -0.022(4) 0.006(3) 0.064(4) 
Cl2A 0.200(12) 0.128(7) 0.161(8) 0.057(6) -0.016(7) -0.092(7) 
C10B 0.075(7) 0.101(8) 0.114(9) -0.035(6) 0.040(6) -0.005(6) 
Cl1B 0.100(5) 0.074(4) 0.150(7) -0.078(4) 0.063(5) -0.030(4) 
Cl2B 0.176(11) 0.043(3) 0.128(7) -0.012(3) -0.046(7) -0.024(4) 
 
_geom_special_details 
; 
 All esds (except the esd in the dihedral angle between two l.s. planes) 
 are estimated using the full covariance matrix.  The cell esds are taken 
 into account individually in the estimation of esds in distances, angles 
 and torsion angles; correlations between esds in cell parameters are only 
 used when they are defined by crystal symmetry.  An approximate (isotropic) 
 treatment of cell esds is used for estimating esds involving l.s. planes. 
; 
 
loop_ 
 _geom_bond_atom_site_label_1 
 _geom_bond_atom_site_label_2 
 _geom_bond_distance 
 _geom_bond_site_symmetry_2 
 _geom_bond_publ_flag 
Re1 C12 1.915(6) . ? 
Re1 C11 1.928(6) . ? 
Re1 C13 1.930(6) . ? 
Re1 C102 2.290(5) . ? 
Re1 C101 2.316(5) . ? 
Re1 B105 2.364(5) . ? 
Re1 B103 2.366(5) . ? 
Re1 B104 2.410(5) . ? 
Re1 Ag1 2.8544(5) . ? 
Ag1 H104 1.88(4) . ? 
Ag1 N42 2.283(4) . ? 
Ag1 N32 2.387(4) . ? 
Ag1 B104 2.509(5) . ? 
C11 O11 1.143(7) . ? 
C12 O12 1.164(7) . ? 
C13 O13 1.147(7) . ? 
C101 C102 1.628(7) . ? 
C101 B110 1.696(7) . ? 
C101 B105 1.699(7) . ? 
C101 B106 1.716(8) . ? 
C102 B103 1.694(7) . ? 
C102 B107 1.704(8) . ? 
C102 B106 1.744(8) . ? 
B103 B108 1.775(8) . ? 
B103 B107 1.784(8) . ? 
B103 B104 1.824(7) . ? 
B104 B108 1.781(7) . ? 
B104 B109 1.784(7) . ? 
B104 B105 1.823(7) . ? 
B105 B110 1.775(7) . ? 
B105 B109 1.780(8) . ? 
B106 B110 1.771(8) . ? 
B106 B107 1.771(8) . ? 
B106 B111 1.774(9) . ? 
B107 B108 1.774(8) . ? 
B107 B111 1.779(8) . ? 
B108 B111 1.776(8) . ? 
B108 B109 1.788(8) . ? 
B109 B110 1.759(8) . ? 
B109 B111 1.782(7) . ? 
B110 B111 1.783(8) . ? 
Re2 C23 1.930(5) . ? 
Re2 C22 1.930(4) . ? 
Re2 C21 1.937(5) . ? 
Re2 C201 2.301(4) . ? 
Re2 C202 2.308(4) . ? 
Re2 B203 2.345(5) . ? 
Re2 B205 2.360(5) . ? 
Re2 B204 2.420(5) . ? 
Re2 Ag2 2.9286(5) . ? 
Ag2 H204 1.82(4) . ? 
Ag2 N52 2.229(4) . ? 
Ag2 B204 2.452(5) . ? 
C21 O21 1.141(6) . ? 
C22 O22 1.148(6) . ? 
C23 O23 1.146(6) . ? 
C201 C202 1.642(6) . ? 
C201 B205 1.695(7) . ? 
C201 B206 1.707(7) . ? 
C201 B207 1.743(7) . ? 
C202 B203 1.692(6) . ? 
C202 B208 1.703(7) . ? 
C202 B207 1.722(7) . ? 
B203 B209 1.782(7) . ? 
B203 B208 1.795(7) . ? 
B203 B204 1.807(7) . ? 
B204 B209 1.782(7) . ? 
B204 B210 1.788(7) . ? 
B204 B205 1.822(7) . ? 
B205 B210 1.783(8) . ? 
B205 B206 1.800(8) . ? 
B206 B207 1.762(8) . ? 
B206 B210 1.772(8) . ? 
B206 B211 1.780(8) . ? 
B207 B208 1.762(7) . ? 
B207 B211 1.774(8) . ? 
B208 B209 1.770(7) . ? 
B208 B211 1.791(8) . ? 
B209 B211 1.786(7) . ? 
B209 B210 1.794(7) . ? 
B210 B211 1.785(8) . ? 
N31 N32 1.363(6) . ? 
N31 C35 1.371(6) . ? 
N31 C60 1.442(6) . ? 
N32 C33 1.324(6) . ? 
C33 C34 1.395(8) . ? 
C34 C35 1.349(8) . ? 
N41 C45 1.357(6) . ? 
N41 N42 1.365(5) . ? 
N41 C60 1.440(6) . ? 
N42 C43 1.337(6) . ? 
C43 C44 1.394(7) . ? 
C44 C45 1.369(7) . ? 
N51 C55 1.356(6) . ? 
N51 N52 1.357(5) . ? 
N51 C60 1.472(6) . ? 
N52 C53 1.339(6) . ? 
C53 C54 1.389(7) . ? 
C54 C55 1.362(7) . ? 
C10A Cl1A 1.591(13) . ? 
C10A Cl2A 1.795(17) . ? 
 
loop_ 
 _geom_angle_atom_site_label_1 
 _geom_angle_atom_site_label_2 
 _geom_angle_atom_site_label_3 
 _geom_angle 
 _geom_angle_site_symmetry_1 
 _geom_angle_site_symmetry_3 
 _geom_angle_publ_flag 
C12 Re1 C11 85.9(3) . . ? 
C12 Re1 C13 93.2(2) . . ? 
C11 Re1 C13 86.0(3) . . ? 
C12 Re1 C102 144.2(2) . . ? 
C11 Re1 C102 87.5(2) . . ? 
C13 Re1 C102 121.4(2) . . ? 
C12 Re1 C101 104.9(2) . . ? 
C11 Re1 C101 97.5(3) . . ? 
C13 Re1 C101 161.7(2) . . ? 
C102 Re1 C101 41.39(17) . . ? 
C12 Re1 B105 88.4(2) . . ? 
C11 Re1 B105 136.0(3) . . ? 
C13 Re1 B105 137.9(2) . . ? 
C102 Re1 B105 72.48(17) . . ? 
C101 Re1 B105 42.55(17) . . ? 
C12 Re1 B103 159.3(2) . . ? 
C11 Re1 B103 114.7(3) . . ? 
C13 Re1 B103 89.8(2) . . ? 
C102 Re1 B103 42.64(17) . . ? 
C101 Re1 B103 72.41(18) . . ? 
B105 Re1 B103 75.86(17) . . ? 
C12 Re1 B104 114.45(19) . . ? 
C11 Re1 B104 158.8(2) . . ? 
C13 Re1 B104 97.9(2) . . ? 
C102 Re1 B104 72.69(17) . . ? 
C101 Re1 B104 72.58(18) . . ? 
B105 Re1 B104 44.88(18) . . ? 
B103 Re1 B104 44.90(17) . . ? 
C12 Re1 Ag1 68.75(15) . . ? 
C11 Re1 Ag1 142.94(19) . . ? 
C13 Re1 Ag1 69.56(17) . . ? 
C102 Re1 Ag1 128.85(12) . . ? 
C101 Re1 Ag1 114.49(13) . . ? 
B105 Re1 Ag1 71.97(12) . . ? 
B103 Re1 Ag1 93.33(12) . . ? 
B104 Re1 Ag1 56.16(11) . . ? 
H104 Ag1 N42 115.8(13) . . ? 
H104 Ag1 N32 121.6(16) . . ? 
N42 Ag1 N32 77.96(13) . . ? 
H104 Ag1 B104 27.1(12) . . ? 
N42 Ag1 B104 141.04(15) . . ? 
N32 Ag1 B104 125.29(15) . . ? 
H104 Ag1 Re1 78.5(12) . . ? 
N42 Ag1 Re1 143.01(9) . . ? 
N32 Ag1 Re1 125.49(10) . . ? 
B104 Ag1 Re1 52.93(11) . . ? 
O11 C11 Re1 178.8(7) . . ? 
O12 C12 Re1 175.5(5) . . ? 
O13 C13 Re1 177.4(5) . . ? 
C102 C101 B110 112.0(4) . . ? 
C102 C101 B105 111.6(4) . . ? 
B110 C101 B105 63.0(3) . . ? 
C102 C101 B106 62.8(3) . . ? 
B110 C101 B106 62.5(3) . . ? 
B105 C101 B106 115.5(4) . . ? 
C102 C101 Re1 68.5(2) . . ? 
B110 C101 Re1 129.5(3) . . ? 
B105 C101 Re1 70.3(2) . . ? 
B106 C101 Re1 129.2(3) . . ? 
C101 C102 B103 112.7(3) . . ? 
C101 C102 B107 110.7(4) . . ? 
B103 C102 B107 63.3(3) . . ? 
C101 C102 B106 61.1(3) . . ? 
B103 C102 B106 115.0(4) . . ? 
B107 C102 B106 61.8(3) . . ? 
C101 C102 Re1 70.2(2) . . ? 
B103 C102 Re1 71.1(2) . . ? 
B107 C102 Re1 130.6(3) . . ? 
B106 C102 Re1 129.2(3) . . ? 
C102 B103 B108 104.0(4) . . ? 
C102 B103 B107 58.6(3) . . ? 
B108 B103 B107 59.8(3) . . ? 
C102 B103 B104 104.7(3) . . ? 
B108 B103 B104 59.3(3) . . ? 
B107 B103 B104 107.7(3) . . ? 
C102 B103 Re1 66.3(2) . . ? 
B108 B103 Re1 122.7(3) . . ? 
B107 B103 Re1 121.8(3) . . ? 
B104 B103 Re1 68.8(2) . . ? 
B108 B104 B109 60.2(3) . . ? 
B108 B104 B105 106.5(4) . . ? 
B109 B104 B105 59.1(3) . . ? 
B108 B104 B103 59.0(3) . . ? 
B109 B104 B103 106.6(3) . . ? 
B105 B104 B103 105.7(3) . . ? 
B108 B104 Re1 120.1(3) . . ? 
B109 B104 Re1 120.2(3) . . ? 
B105 B104 Re1 66.2(2) . . ? 
B103 B104 Re1 66.3(2) . . ? 
B108 B104 Ag1 163.0(3) . . ? 
B109 B104 Ag1 127.9(3) . . ? 
B105 B104 Ag1 89.6(3) . . ? 
B103 B104 Ag1 122.4(3) . . ? 
Re1 B104 Ag1 70.90(14) . . ? 
C101 B105 B110 58.4(3) . . ? 
C101 B105 B109 103.6(4) . . ? 
B110 B105 B109 59.3(3) . . ? 
C101 B105 B104 105.2(3) . . ? 
B110 B105 B104 107.5(4) . . ? 
B109 B105 B104 59.3(3) . . ? 
C101 B105 Re1 67.2(2) . . ? 
B110 B105 Re1 122.4(3) . . ? 
B109 B105 Re1 122.8(3) . . ? 
B104 B105 Re1 68.9(2) . . ? 
C101 B106 C102 56.1(3) . . ? 
C101 B106 B110 58.2(3) . . ? 
C102 B106 B110 103.2(4) . . ? 
C101 B106 B107 103.6(4) . . ? 
C102 B106 B107 58.0(3) . . ? 
B110 B106 B107 108.0(4) . . ? 
C101 B106 B111 104.4(4) . . ? 
C102 B106 B111 103.9(4) . . ? 
B110 B106 B111 60.4(3) . . ? 
B107 B106 B111 60.2(3) . . ? 
C102 B107 B106 60.2(3) . . ? 
C102 B107 B108 103.7(4) . . ? 
B106 B107 B108 108.0(4) . . ? 
C102 B107 B111 105.3(4) . . ? 
B106 B107 B111 60.0(3) . . ? 
B108 B107 B111 60.0(3) . . ? 
C102 B107 B103 58.1(3) . . ? 
B106 B107 B103 109.3(4) . . ? 
B108 B107 B103 59.9(3) . . ? 
B111 B107 B103 108.6(4) . . ? 
B107 B108 B111 60.1(3) . . ? 
B107 B108 B103 60.3(3) . . ? 
B111 B108 B103 109.1(4) . . ? 
B107 B108 B104 110.0(4) . . ? 
B111 B108 B104 109.6(4) . . ? 
B103 B108 B104 61.7(3) . . ? 
B107 B108 B109 107.7(4) . . ? 
B111 B108 B109 60.0(3) . . ? 
B103 B108 B109 108.6(4) . . ? 
B104 B108 B109 60.0(3) . . ? 
B110 B109 B105 60.2(3) . . ? 
B110 B109 B104 110.0(4) . . ? 
B105 B109 B104 61.5(3) . . ? 
B110 B109 B111 60.5(3) . . ? 
B105 B109 B111 108.9(4) . . ? 
B104 B109 B111 109.2(4) . . ? 
B110 B109 B108 107.8(4) . . ? 
B105 B109 B108 108.1(4) . . ? 
B104 B109 B108 59.8(3) . . ? 
B111 B109 B108 59.7(3) . . ? 
C101 B110 B109 104.6(4) . . ? 
C101 B110 B106 59.3(3) . . ? 
B109 B110 B106 108.5(4) . . ? 
C101 B110 B105 58.6(3) . . ? 
B109 B110 B105 60.5(3) . . ? 
B106 B110 B105 109.1(4) . . ? 
C101 B110 B111 104.8(4) . . ? 
B109 B110 B111 60.4(3) . . ? 
B106 B110 B111 59.9(3) . . ? 
B105 B110 B111 109.1(4) . . ? 
B106 B111 B108 107.8(4) . . ? 
B106 B111 B107 59.8(3) . . ? 
B108 B111 B107 59.9(3) . . ? 
B106 B111 B109 107.4(4) . . ? 
B108 B111 B109 60.3(3) . . ? 
B107 B111 B109 107.8(4) . . ? 
B106 B111 B110 59.7(3) . . ? 
B108 B111 B110 107.2(4) . . ? 
B107 B111 B110 107.1(4) . . ? 
B109 B111 B110 59.1(3) . . ? 
C23 Re2 C22 93.1(2) . . ? 
C23 Re2 C21 85.1(2) . . ? 
C22 Re2 C21 85.8(2) . . ? 
C23 Re2 C201 112.41(18) . . ? 
C22 Re2 C201 154.01(17) . . ? 
C21 Re2 C201 91.55(17) . . ? 
C23 Re2 C202 153.81(18) . . ? 
C22 Re2 C202 112.37(17) . . ? 
C21 Re2 C202 90.72(17) . . ? 
C201 Re2 C202 41.73(15) . . ? 
C23 Re2 B203 150.55(19) . . ? 
C22 Re2 B203 87.56(18) . . ? 
C21 Re2 B203 124.23(18) . . ? 
C201 Re2 B203 72.61(16) . . ? 
C202 Re2 B203 42.64(16) . . ? 
C23 Re2 B205 89.1(2) . . ? 
C22 Re2 B205 148.09(19) . . ? 
C21 Re2 B205 126.08(18) . . ? 
C201 Re2 B205 42.64(17) . . ? 
C202 Re2 B205 72.52(17) . . ? 
B203 Re2 B205 75.49(17) . . ? 
C23 Re2 B204 107.53(19) . . ? 
C22 Re2 B204 104.88(18) . . ? 
C21 Re2 B204 162.59(18) . . ? 
C201 Re2 B204 72.77(16) . . ? 
C202 Re2 B204 72.61(16) . . ? 
B203 Re2 B204 44.54(16) . . ? 
B205 Re2 B204 44.78(16) . . ? 
C23 Re2 Ag2 68.04(15) . . ? 
C22 Re2 Ag2 72.52(14) . . ? 
C21 Re2 Ag2 143.85(14) . . ? 
C201 Re2 Ag2 120.40(11) . . ? 
C202 Re2 Ag2 123.98(11) . . ? 
B203 Re2 Ag2 84.24(12) . . ? 
B205 Re2 Ag2 78.94(12) . . ? 
B204 Re2 Ag2 53.56(11) . . ? 
H204 Ag2 N52 144.6(15) . . ? 
H204 Ag2 B204 28.4(12) . . ? 
N52 Ag2 B204 152.41(15) . . ? 
H204 Ag2 Re2 80.7(12) . . ? 
N52 Ag2 Re2 122.69(10) . . ? 
B204 Ag2 Re2 52.55(11) . . ? 
O21 C21 Re2 177.2(5) . . ? 
O22 C22 Re2 176.1(4) . . ? 
O23 C23 Re2 175.5(4) . . ? 
C202 C201 B205 111.7(3) . . ? 
C202 C201 B206 110.3(3) . . ? 
B205 C201 B206 63.9(3) . . ? 
C202 C201 B207 61.1(3) . . ? 
B205 C201 B207 114.7(4) . . ? 
B206 C201 B207 61.4(3) . . ? 
C202 C201 Re2 69.4(2) . . ? 
B205 C201 Re2 70.6(2) . . ? 
B206 C201 Re2 130.4(3) . . ? 
B207 C201 Re2 128.3(3) . . ? 
C201 C202 B203 111.2(3) . . ? 
C201 C202 B208 111.7(3) . . ? 
B203 C202 B208 63.8(3) . . ? 
C201 C202 B207 62.4(3) . . ? 
B203 C202 B207 115.0(3) . . ? 
B208 C202 B207 61.9(3) . . ? 
C201 C202 Re2 68.9(2) . . ? 
B203 C202 Re2 69.9(2) . . ? 
B208 C202 Re2 130.1(3) . . ? 
B207 C202 Re2 129.1(3) . . ? 
C202 B203 B209 104.0(3) . . ? 
C202 B203 B208 58.4(3) . . ? 
B209 B203 B208 59.3(3) . . ? 
C202 B203 B204 106.3(3) . . ? 
B209 B203 B204 59.5(3) . . ? 
B208 B203 B204 108.0(3) . . ? 
C202 B203 Re2 67.5(2) . . ? 
B209 B203 Re2 124.0(3) . . ? 
B208 B203 Re2 122.9(3) . . ? 
B204 B203 Re2 69.9(2) . . ? 
B209 B204 B210 60.3(3) . . ? 
B209 B204 B203 59.5(3) . . ? 
B210 B204 B203 106.8(3) . . ? 
B209 B204 B205 106.7(3) . . ? 
B210 B204 B205 59.2(3) . . ? 
B203 B204 B205 105.1(3) . . ? 
B209 B204 Re2 120.0(3) . . ? 
B210 B204 Re2 119.9(3) . . ? 
B203 B204 Re2 65.5(2) . . ? 
B205 B204 Re2 65.9(2) . . ? 
B209 B204 Ag2 149.2(3) . . ? 
B210 B204 Ag2 140.1(3) . . ? 
B203 B204 Ag2 112.7(3) . . ? 
B205 B204 Ag2 104.0(3) . . ? 
Re2 B204 Ag2 73.90(14) . . ? 
C201 B205 B210 104.1(4) . . ? 
C201 B205 B206 58.4(3) . . ? 
B210 B205 B206 59.3(3) . . ? 
C201 B205 B204 105.6(3) . . ? 
B210 B205 B204 59.5(3) . . ? 
B206 B205 B204 107.4(4) . . ? 
C201 B205 Re2 66.8(2) . . ? 
B210 B205 Re2 123.3(3) . . ? 
B206 B205 Re2 121.9(3) . . ? 
B204 B205 Re2 69.3(2) . . ? 
C201 B206 B207 60.3(3) . . ? 
C201 B206 B210 104.0(3) . . ? 
B207 B206 B210 108.2(4) . . ? 
C201 B206 B211 106.0(4) . . ? 
B207 B206 B211 60.1(3) . . ? 
B210 B206 B211 60.3(3) . . ? 
C201 B206 B205 57.7(3) . . ? 
B207 B206 B205 108.7(4) . . ? 
B210 B206 B205 59.9(3) . . ? 
B211 B206 B205 108.7(4) . . ? 
C202 B207 C201 56.6(3) . . ? 
C202 B207 B208 58.5(3) . . ? 
C201 B207 B208 104.3(3) . . ? 
C202 B207 B206 104.2(4) . . ? 
C201 B207 B206 58.3(3) . . ? 
B208 B207 B206 108.7(4) . . ? 
C202 B207 B211 105.1(3) . . ? 
C201 B207 B211 104.8(4) . . ? 
B208 B207 B211 60.8(3) . . ? 
B206 B207 B211 60.4(3) . . ? 
C202 B208 B207 59.6(3) . . ? 
C202 B208 B209 104.0(3) . . ? 
B207 B208 B209 107.9(4) . . ? 
C202 B208 B211 105.1(3) . . ? 
B207 B208 B211 59.9(3) . . ? 
B209 B208 B211 60.2(3) . . ? 
C202 B208 B203 57.8(3) . . ? 
B207 B208 B203 108.1(4) . . ? 
B209 B208 B203 60.0(3) . . ? 
B211 B208 B203 108.3(3) . . ? 
B208 B209 B204 110.3(4) . . ? 
B208 B209 B203 60.7(3) . . ? 
B204 B209 B203 60.9(3) . . ? 
B208 B209 B211 60.5(3) . . ? 
B204 B209 B211 109.7(3) . . ? 
B203 B209 B211 109.1(4) . . ? 
B208 B209 B210 107.8(3) . . ? 
B204 B209 B210 60.0(3) . . ? 
B203 B209 B210 107.6(3) . . ? 
B211 B209 B210 59.8(3) . . ? 
B206 B210 B205 60.8(3) . . ? 
B206 B210 B211 60.0(3) . . ? 
B205 B210 B211 109.3(4) . . ? 
B206 B210 B204 110.1(4) . . ? 
B205 B210 B204 61.4(3) . . ? 
B211 B210 B204 109.4(3) . . ? 
B206 B210 B209 107.3(4) . . ? 
B205 B210 B209 107.9(3) . . ? 
B211 B210 B209 59.9(3) . . ? 
B204 B210 B209 59.7(3) . . ? 
B207 B211 B206 59.5(3) . . ? 
B207 B211 B210 107.1(4) . . ? 
B206 B211 B210 59.6(3) . . ? 
B207 B211 B209 106.7(4) . . ? 
B206 B211 B209 107.4(4) . . ? 
B210 B211 B209 60.3(3) . . ? 
B207 B211 B208 59.3(3) . . ? 
B206 B211 B208 106.7(4) . . ? 
B210 B211 B208 107.3(4) . . ? 
B209 B211 B208 59.3(3) . . ? 
N32 N31 C35 111.0(4) . . ? 
N32 N31 C60 120.9(3) . . ? 
C35 N31 C60 127.4(4) . . ? 
C33 N32 N31 104.7(4) . . ? 
C33 N32 Ag1 136.0(4) . . ? 
N31 N32 Ag1 118.7(3) . . ? 
N32 C33 C34 111.6(5) . . ? 
C35 C34 C33 105.9(5) . . ? 
C34 C35 N31 106.7(5) . . ? 
C45 N41 N42 111.7(4) . . ? 
C45 N41 C60 126.9(4) . . ? 
N42 N41 C60 120.9(3) . . ? 
C43 N42 N41 104.1(3) . . ? 
C43 N42 Ag1 134.5(3) . . ? 
N41 N42 Ag1 121.1(3) . . ? 
N42 C43 C44 112.1(4) . . ? 
C45 C44 C43 105.0(4) . . ? 
N41 C45 C44 107.2(4) . . ? 
C55 N51 N52 111.5(4) . . ? 
C55 N51 C60 127.1(4) . . ? 
N52 N51 C60 120.8(4) . . ? 
C53 N52 N51 104.6(4) . . ? 
C53 N52 Ag2 120.2(3) . . ? 
N51 N52 Ag2 133.3(3) . . ? 
N52 C53 C54 111.2(4) . . ? 
C55 C54 C53 105.7(4) . . ? 
N51 C55 C54 107.0(4) . . ? 
N41 C60 N31 112.4(4) . . ? 
N41 C60 N51 109.8(3) . . ? 
N31 C60 N51 108.4(4) . . ? 
Cl1A C10A Cl2A 100.1(8) . . ? 
 
_diffrn_measured_fraction_theta_max    0.992 
_diffrn_reflns_theta_full              27.49 
_diffrn_measured_fraction_theta_full   0.992 
_refine_diff_density_max    1.385 
_refine_diff_density_min   -2.020 
_refine_diff_density_rms    0.190 

#===END
 
data_7 

_audit_creation_method            SHELXL-97 
_chemical_name_systematic 

; 
? 
; 

_chemical_name_common             ? 
_chemical_formula_moiety          ? 
_chemical_formula_sum           'C20.50 H23 Ag B9 Cl N3 O3 Re' 
_chemical_formula_weight          786.23 


loop_ 
_atom_type_symbol 
_atom_type_description 
_atom_type_scat_dispersion_real 
_atom_type_scat_dispersion_imag 
_atom_type_scat_source 
'C'  'C'   0.0033   0.0016 
'International Tables Vol C Tables 4.2.6.8 and 6.1.1.4' 
'H'  'H'   0.0000   0.0000 
'International Tables Vol C Tables 4.2.6.8 and 6.1.1.4' 
'B'  'B'   0.0013   0.0007 
'International Tables Vol C Tables 4.2.6.8 and 6.1.1.4' 
'N'  'N'   0.0061   0.0033 
'International Tables Vol C Tables 4.2.6.8 and 6.1.1.4' 
'O'  'O'   0.0106   0.0060 
'International Tables Vol C Tables 4.2.6.8 and 6.1.1.4' 
'Ag'  'Ag'  -0.8971   1.1015 
'International Tables Vol C Tables 4.2.6.8 and 6.1.1.4' 
'Re'  'Re'  -1.0185   7.2310 
'International Tables Vol C Tables 4.2.6.8 and 6.1.1.4' 
'Cl'  'Cl'   0.1484   0.1585 
'International Tables Vol C Tables 4.2.6.8 and 6.1.1.4' 


_symmetry_cell_setting            Monoclinic 
_symmetry_space_group_name_H-M    C2/c 

loop_ 
 _symmetry_equiv_pos_as_xyz 
 'x, y, z' 
 '-x, y, -z+1/2' 
 'x+1/2, y+1/2, z' 
 '-x+1/2, y+1/2, -z+1/2' 
 '-x, -y, -z' 
 'x, -y, z-1/2' 
 '-x+1/2, -y+1/2, -z' 
 'x+1/2, -y+1/2, z-1/2' 
 
_cell_length_a                    18.054(7) 
_cell_length_b                    12.3798(12) 
_cell_length_c                    25.173(4) 
_cell_angle_alpha                 90.00 
_cell_angle_beta                  102.81(2) 
_cell_angle_gamma                 90.00 
_cell_volume                      5486(2) 
_cell_formula_units_Z             8 
_cell_measurement_temperature     293(2) 
_cell_measurement_reflns_used     25 
_cell_measurement_theta_min       20 
_cell_measurement_theta_max       25 

_exptl_crystal_description        prism
_exptl_crystal_colour             colorless 
_exptl_crystal_size_max           0.66 
_exptl_crystal_size_mid           0.62 
_exptl_crystal_size_min           0.49 
_exptl_crystal_density_meas       ? 
_exptl_crystal_density_diffrn     1.904 
_exptl_crystal_density_method     'not measured' 
_exptl_crystal_F_000              3000 
_exptl_absorpt_coefficient_mu     5.250 
_exptl_absorpt_correction_type    Numerical 
_exptl_absorpt_correction_T_min   0.09210 
_exptl_absorpt_correction_T_max   0.14880 
 _exptl_special_details 

; 
 ? 
; 
 
_diffrn_ambient_temperature       293(2) 
_diffrn_radiation_wavelength      0.71073 
_diffrn_radiation_type            MoK\a 
_diffrn_radiation_source          'fine-focus sealed tube' 
_diffrn_radiation_monochromator   graphite 
_diffrn_measurement_device_type   'Enraf-Nonius CAD4'
_diffrn_measurement_method        \w-4/3\q 
_diffrn_detector_area_resol_mean  ? 
_diffrn_standards_number          3 
_diffrn_standards_interval_count  ? 
_diffrn_standards_interval_time   120 
_diffrn_standards_decay_%         10.68 
_diffrn_reflns_number             4964 
_diffrn_reflns_av_R_equivalents   0.0415 
_diffrn_reflns_av_sigmaI/netI     0.0195 
_diffrn_reflns_limit_h_min        0 
_diffrn_reflns_limit_h_max        21 
_diffrn_reflns_limit_k_min        0 
_diffrn_reflns_limit_k_max        14 
_diffrn_reflns_limit_l_min        -29 
_diffrn_reflns_limit_l_max        29 
_diffrn_reflns_theta_min          1.66 
_diffrn_reflns_theta_max          24.96 
_reflns_number_total              4799 
_reflns_number_gt                 4153 
_reflns_threshold_expression      >2sigma(I) 


_computing_data_collection        ? 
_computing_cell_refinement        ? 
_computing_data_reduction         ? 
_computing_structure_solution     'SHELXS-97 (Sheldrick, 1990)' 
_computing_structure_refinement   'SHELXL-97 (Sheldrick, 1997)' 
_computing_molecular_graphics     ? 
_computing_publication_material   ? 
 

_refine_special_details 

; 
 Refinement of F^2^ against ALL reflections.  The weighted R-factor wR and 
 goodness of fit S are based on F^2^, conventional R-factors R are based 
 on F, with F set to zero for negative F^2^. The threshold expression of 
 F^2^ > 2sigma(F^2^) is used only for calculating R-factors(gt) etc. and is 
 not relevant to the choice of reflections for refinement.  R-factors based 
 on F^2^ are statistically about twice as large as those based on F, and R- 
 factors based on ALL data will be even larger. 
; 
 
_refine_ls_structure_factor_coef  Fsqd  
_refine_ls_matrix_type            full 
_refine_ls_weighting_scheme 
 ;
calcw=1/[\s^2^(Fo^2^)+(0.0614P)^2^+8.7130P] where
P=(Fo^2^+2Fc^2^)/3
;
_atom_sites_solution_primary      direct 
_atom_sites_solution_secondary    difmap 
_atom_sites_solution_hydrogens    geom 
_refine_ls_hydrogen_treatment     mixed 
_refine_ls_extinction_method      SHELXL 
_refine_ls_extinction_coef        0.00049(4) 
_refine_ls_extinction_expression 
;
Fc^*^=kFc[1+0.001xFc^2^\l^3^/sin(2\q)]^-1/4^
;
_refine_ls_number_reflns          4799 
_refine_ls_number_parameters      362 
_refine_ls_number_restraints      0 
_refine_ls_R_factor_all           0.0468 
_refine_ls_R_factor_gt            0.0376 
_refine_ls_wR_factor_ref          0.0999 
_refine_ls_wR_factor_gt           0.0936 
_refine_ls_goodness_of_fit_ref    1.155 
_refine_ls_restrained_S_all       1.155 
_refine_ls_shift/su_max           0.001 
_refine_ls_shift/su_mean          0.000 
 
loop_ 
 _atom_site_label 
 _atom_site_type_symbol 
 _atom_site_fract_x 
 _atom_site_fract_y 
 _atom_site_fract_z 
 _atom_site_U_iso_or_equiv 
 _atom_site_adp_type 
 _atom_site_occupancy 
 _atom_site_calc_flag 
 _atom_site_refinement_flags 
 _atom_site_disorder_assembly 
 _atom_site_disorder_group 
Re Re 0.740322(14) 0.346944(18) 0.109060(10) 0.04003(12) Uani 1 d . . . 
C1 C 0.6548(4) 0.3397(5) 0.1644(3) 0.0458(15) Uani 1 d . . . 
H1 H 0.6165 0.2746 0.1453 0.055 Uiso 1 calc R . . 
C2 C 0.7399(4) 0.3149(5) 0.1988(3) 0.0461(15) Uani 1 d . . . 
H2 H 0.7623 0.2320 0.2039 0.055 Uiso 1 calc R . . 
B3 B 0.8014(4) 0.4165(6) 0.1947(3) 0.0440(16) Uani 1 d . . . 
H3 H 0.8627 0.4080 0.1972 0.053 Uiso 1 calc R . . 
B4 B 0.7439(4) 0.5180(5) 0.1538(3) 0.0359(14) Uani 1 d . . . 
H4 H 0.769(3) 0.589(5) 0.134(3) 0.043 Uiso 1 d . . . 
B5 B 0.6499(4) 0.4628(6) 0.1339(3) 0.0419(16) Uani 1 d . . . 
H5 H 0.6103 0.4855 0.0957 0.050 Uiso 1 calc R . . 
B6 B 0.6712(5) 0.3457(6) 0.2345(3) 0.053(2) Uani 1 d . . . 
H6 H 0.6475 0.2892 0.2601 0.063 Uiso 1 calc R . . 
B7 B 0.7635(5) 0.3976(6) 0.2544(3) 0.0501(19) Uani 1 d . . . 
H7 H 0.8002 0.3748 0.2938 0.060 Uiso 1 calc R . . 
B8 B 0.7658(4) 0.5263(6) 0.2262(3) 0.0404(15) Uani 1 d . . . 
H8 H 0.8042 0.5893 0.2473 0.048 Uiso 1 calc R . . 
B9 B 0.6727(4) 0.5548(6) 0.1884(3) 0.0416(16) Uani 1 d . . . 
H9 H 0.6495 0.6373 0.1848 0.050 Uiso 1 calc R . . 
B10 B 0.6148(4) 0.4434(6) 0.1929(3) 0.0441(16) Uani 1 d . . . 
H10 H 0.5537 0.4513 0.1916 0.053 Uiso 1 calc R . . 
B11 B 0.6860(5) 0.4830(6) 0.2503(3) 0.0458(17) Uani 1 d . . . 
H11 H 0.6720 0.5183 0.2869 0.055 Uiso 1 calc R . . 
C3 C 0.8350(5) 0.3467(6) 0.0872(4) 0.062(2) Uani 1 d . . . 
O3 O 0.8944(4) 0.3444(5) 0.0770(3) 0.100(2) Uani 1 d . . . 
C4 C 0.7390(4) 0.1943(6) 0.0961(3) 0.0578(19) Uani 1 d . . . 
O4 O 0.7378(4) 0.1030(5) 0.0897(3) 0.092(2) Uani 1 d . . . 
C5 C 0.6838(5) 0.3565(6) 0.0358(3) 0.061(2) Uani 1 d . . . 
O5 O 0.6449(5) 0.3597(5) -0.0076(2) 0.094(2) Uani 1 d . . . 
Ag Ag 0.78389(3) 0.55928(5) 0.064508(19) 0.05048(17) Uani 1 d . . . 
N21 N 0.9246(3) 0.5951(5) 0.1070(2) 0.0529(14) Uani 1 d . . . 
C22 C 0.9583(4) 0.5683(8) 0.1580(3) 0.073(3) Uani 1 d . . . 
H22 H 0.9289 0.5659 0.1840 0.087 Uiso 1 calc R . . 
C23 C 1.0344(5) 0.5440(7) 0.1739(4) 0.077(3) Uani 1 d . . . 
H23 H 1.0553 0.5239 0.2097 0.092 Uiso 1 calc R . . 
C24 C 1.0786(4) 0.5497(7) 0.1367(3) 0.068(2) Uani 1 d . . . 
H24 H 1.1302 0.5342 0.1467 0.082 Uiso 1 calc R . . 
C25 C 1.0455(4) 0.5790(6) 0.0836(3) 0.0528(16) Uani 1 d . . . 
H25 H 1.0743 0.5838 0.0573 0.063 Uiso 1 calc R . . 
C26 C 0.9681(3) 0.6009(5) 0.0709(3) 0.0415(13) Uani 1 d . . . 
N31 N 0.8537(3) 0.6199(4) 0.00129(19) 0.0376(11) Uani 1 d . . . 
C32 C 0.9292(3) 0.6360(5) 0.0149(2) 0.0385(13) Uani 1 d . . . 
C33 C 0.9677(4) 0.6849(6) -0.0203(3) 0.0531(16) Uani 1 d . . . 
H33 H 1.0201 0.6934 -0.0103 0.064 Uiso 1 calc R . . 
C34 C 0.9278(4) 0.7209(7) -0.0703(3) 0.062(2) Uani 1 d . . . 
H34 H 0.9528 0.7540 -0.0945 0.074 Uiso 1 calc R . . 
C35 C 0.8508(4) 0.7070(5) -0.0836(3) 0.0469(15) Uani 1 d . . . 
H35 H 0.8227 0.7319 -0.1168 0.056 Uiso 1 calc R . . 
C36 C 0.8146(4) 0.6560(4) -0.0476(2) 0.0375(13) Uani 1 d . . . 
N41 N 0.7005(3) 0.6136(4) -0.0174(2) 0.0412(11) Uani 1 d . . . 
C42 C 0.7314(4) 0.6396(5) -0.0593(2) 0.0395(13) Uani 1 d . . . 
C43 C 0.6877(4) 0.6519(6) -0.1117(3) 0.0572(19) Uani 1 d . . . 
H43 H 0.7100 0.6710 -0.1403 0.069 Uiso 1 calc R . . 
C44 C 0.6107(5) 0.6352(7) -0.1204(3) 0.065(2) Uani 1 d . . . 
H44 H 0.5804 0.6414 -0.1553 0.079 Uiso 1 calc R . . 
C45 C 0.5786(4) 0.6097(7) -0.0783(3) 0.064(2) Uani 1 d . . . 
H45 H 0.5265 0.5990 -0.0836 0.076 Uiso 1 calc R . . 
C46 C 0.6259(4) 0.6002(6) -0.0268(3) 0.0585(18) Uani 1 d . . . 
H46 H 0.6042 0.5837 0.0024 0.070 Uiso 1 calc R . . 
C50 C 0.5000 0.6593(17) 0.2500 0.25(2) Uani 0.50 d SP . 1 
H50A H 0.5387 0.6105 0.2429 0.294 Uiso 0.25 calc PR . 1 
H50B H 0.4613 0.6105 0.2571 0.294 Uiso 0.25 calc PR . 1 
Cl1 Cl 0.9527(6) 0.1744(10) 0.1750(5) 0.182(7) Uani 0.542(14) d P . 1 
C50A C 0.5000 0.6593(17) 0.2500 0.25(2) Uani 0.50 d SP . 2 
H50C H 0.5450 0.6167 0.2647 0.294 Uiso 0.25 calc PR . 2 
H50D H 0.4550 0.6167 0.2353 0.294 Uiso 0.25 calc PR . 2 
Cl2 Cl 1.0111(8) 0.2632(10) 0.2194(8) 0.207(9) Uani 0.458(14) d P . 2 
 
loop_ 
 _atom_site_aniso_label 
 _atom_site_aniso_U_11 
 _atom_site_aniso_U_22 
 _atom_site_aniso_U_33 
 _atom_site_aniso_U_23 
 _atom_site_aniso_U_13 
 _atom_site_aniso_U_12 
Re 0.04603(18) 0.03768(17) 0.04241(17) -0.00867(10) 0.02272(11) -0.00479(10) 
C1 0.046(3) 0.048(4) 0.049(4) -0.007(3) 0.022(3) -0.009(3) 
C2 0.062(4) 0.041(3) 0.043(3) 0.008(3) 0.028(3) 0.011(3) 
B3 0.037(4) 0.044(4) 0.049(4) -0.003(3) 0.006(3) 0.008(3) 
B4 0.040(4) 0.036(3) 0.032(3) 0.001(3) 0.008(3) -0.001(3) 
B5 0.036(4) 0.058(4) 0.033(3) -0.001(3) 0.010(3) 0.000(3) 
B6 0.072(5) 0.044(4) 0.052(5) 0.004(3) 0.035(4) -0.008(4) 
B7 0.067(5) 0.046(4) 0.032(4) 0.007(3) 0.002(4) 0.008(4) 
B8 0.044(4) 0.039(4) 0.035(3) -0.003(3) 0.001(3) 0.001(3) 
B9 0.050(4) 0.043(4) 0.034(3) 0.004(3) 0.015(3) 0.011(3) 
B10 0.043(4) 0.052(4) 0.044(4) -0.007(3) 0.024(3) 0.002(3) 
B11 0.066(5) 0.042(4) 0.037(4) 0.000(3) 0.027(3) 0.004(3) 
C3 0.072(5) 0.053(4) 0.075(5) -0.021(4) 0.044(4) -0.012(4) 
O3 0.077(4) 0.101(5) 0.149(7) -0.043(4) 0.080(5) -0.012(3) 
C4 0.068(5) 0.041(4) 0.076(5) -0.010(4) 0.041(4) -0.003(3) 
O4 0.112(5) 0.047(3) 0.133(6) -0.019(4) 0.062(4) -0.006(3) 
C5 0.088(6) 0.053(4) 0.045(4) -0.016(3) 0.022(4) -0.008(4) 
O5 0.147(6) 0.084(4) 0.046(3) -0.016(3) 0.010(4) -0.032(4) 
Ag 0.0503(3) 0.0685(3) 0.0349(3) 0.0064(2) 0.0142(2) -0.0108(2) 
N21 0.038(3) 0.078(4) 0.043(3) 0.007(3) 0.008(2) -0.019(3) 
C22 0.057(5) 0.115(7) 0.041(4) 0.021(4) 0.000(3) -0.030(5) 
C23 0.061(5) 0.092(6) 0.063(5) 0.029(5) -0.017(4) -0.023(4) 
C24 0.047(4) 0.073(5) 0.074(5) 0.007(4) -0.011(4) 0.001(4) 
C25 0.042(4) 0.060(4) 0.055(4) -0.004(3) 0.007(3) 0.000(3) 
C26 0.040(3) 0.039(3) 0.043(3) -0.002(3) 0.004(3) -0.006(3) 
N31 0.040(3) 0.039(3) 0.036(3) -0.001(2) 0.012(2) -0.002(2) 
C32 0.039(3) 0.041(3) 0.037(3) -0.002(2) 0.011(3) 0.002(3) 
C33 0.042(4) 0.072(4) 0.051(4) 0.001(3) 0.022(3) -0.002(3) 
C34 0.069(5) 0.079(5) 0.047(4) 0.010(4) 0.034(4) -0.002(4) 
C35 0.051(4) 0.055(4) 0.037(3) 0.008(3) 0.013(3) 0.005(3) 
C36 0.048(3) 0.039(3) 0.027(3) -0.001(2) 0.012(2) 0.004(3) 
N41 0.042(3) 0.047(3) 0.034(3) -0.002(2) 0.009(2) 0.006(2) 
C42 0.048(3) 0.035(3) 0.036(3) -0.003(2) 0.008(3) 0.004(3) 
C43 0.063(5) 0.071(5) 0.034(3) 0.000(3) 0.003(3) 0.010(4) 
C44 0.062(5) 0.079(5) 0.046(4) -0.005(4) -0.007(4) 0.000(4) 
C45 0.040(4) 0.079(5) 0.066(5) -0.004(4) -0.002(3) -0.005(4) 
C46 0.047(4) 0.067(5) 0.064(5) -0.003(4) 0.016(3) -0.003(3) 
C50 0.39(5) 0.102(17) 0.35(5) 0.000 0.31(5) 0.000 
Cl1 0.142(8) 0.199(12) 0.227(12) 0.104(9) 0.091(8) 0.069(8) 
C50A 0.39(5) 0.102(17) 0.35(5) 0.000 0.31(5) 0.000 
Cl2 0.151(10) 0.136(9) 0.37(2) 0.033(11) 0.139(12) 0.021(7) 
 
_geom_special_details 

; 
 All esds (except the esd in the dihedral angle between two l.s. planes) 
 are estimated using the full covariance matrix.  The cell esds are taken 
 into account individually in the estimation of esds in distances, angles 
 and torsion angles; correlations between esds in cell parameters are only 
 used when they are defined by crystal symmetry.  An approximate (isotropic) 
 treatment of cell esds is used for estimating esds involving l.s. planes. 
; 
 
loop_ 
 _geom_bond_atom_site_label_1 
 _geom_bond_atom_site_label_2 
 _geom_bond_distance 
 _geom_bond_site_symmetry_2 
 _geom_bond_publ_flag 
Re C5 1.902(8) . y 
Re C3 1.909(8) . y 
Re C4 1.917(7) . y 
Re C2 2.295(6) . y 
Re C1 2.299(6) . y 
Re B3 2.356(7) . y 
Re B5 2.358(7) . y 
Re B4 2.393(6) . y 
Re Ag 3.0295(6) . y 
C1 C2 1.617(10) . ? 
C1 B5 1.700(10) . ? 
C1 B10 1.707(9) . ? 
C1 B6 1.725(10) . ? 
C2 B3 1.697(10) . ? 
C2 B7 1.710(10) . ? 
C2 B6 1.728(10) . ? 
B3 B8 1.766(10) . ? 
B3 B7 1.798(11) . ? 
B3 B4 1.800(9) . ? 
B4 H4 1.15(6) . y 
B4 B9 1.765(9) . ? 
B4 B8 1.780(9) . ? 
B4 B5 1.795(9) . ? 
B4 Ag 2.560(7) . y 
B5 B10 1.757(9) . ? 
B5 B9 1.761(10) . ? 
B6 B11 1.753(10) . ? 
B6 B7 1.754(12) . ? 
B6 B10 1.768(11) . ? 
B7 B11 1.739(11) . ? 
B7 B8 1.749(10) . ? 
B8 B11 1.765(10) . ? 
B8 B9 1.773(10) . ? 
B9 B10 1.749(10) . ? 
B9 B11 1.762(9) . ? 
B10 B11 1.777(11) . ? 
C3 O3 1.157(9) . y 
C4 O4 1.141(10) . y 
C5 O5 1.161(10) . y 
Ag H4 1.86(6) . y 
Ag N31 2.361(5) . y 
Ag N41 2.365(5) . y 
Ag N21 2.568(5) . y 
N21 C26 1.328(8) . ? 
N21 C22 1.334(9) . ? 
C22 C23 1.376(11) . ? 
C23 C24 1.362(12) . ? 
C24 C25 1.385(10) . ? 
C25 C26 1.390(9) . ? 
C26 C32 1.495(8) . ? 
N31 C32 1.344(8) . ? 
N31 C36 1.351(7) . ? 
C32 C33 1.381(9) . ? 
C33 C34 1.379(10) . ? 
C34 C35 1.368(10) . ? 
C35 C36 1.382(9) . ? 
C36 C42 1.480(9) . ? 
N41 C46 1.324(8) . ? 
N41 C42 1.339(8) . ? 
C42 C43 1.387(9) . ? 
C43 C44 1.375(11) . ? 
C44 C45 1.353(11) . ? 
C45 C46 1.390(10) . ? 
C50 Cl1 1.900(12) 3_455 ? 
C50 Cl1 1.900(12) 4_655 ? 
Cl1 C50 1.900(12) 3_545 ? 
Cl2 C50A 1.53(2) 3_545 ? 
Cl2 Cl2 1.67(3) 2_755 ? 
 
loop_ 
 _geom_angle_atom_site_label_1 
 _geom_angle_atom_site_label_2 
 _geom_angle_atom_site_label_3 
 _geom_angle 
 _geom_angle_site_symmetry_1 
 _geom_angle_site_symmetry_3 
 _geom_angle_publ_flag 
C5 Re C3 92.5(4) . . y 
C5 Re C4 85.0(3) . . y 
C3 Re C4 85.8(3) . . y 
C5 Re C2 147.8(3) . . y 
C3 Re C2 118.8(3) . . y 
C4 Re C2 89.7(3) . . y 
C5 Re C1 107.5(3) . . y 
C3 Re C1 160.0(3) . . y 
C4 Re C1 94.6(3) . . y 
C2 Re C1 41.2(2) . . y 
C5 Re B3 154.9(3) . . y 
C3 Re B3 89.8(3) . . y 
C4 Re B3 120.1(3) . . y 
C2 Re B3 42.8(3) . . ? 
C1 Re B3 72.6(3) . . ? 
C5 Re B5 88.0(3) . . y 
C3 Re B5 142.6(3) . . y 
C4 Re B5 131.4(3) . . y 
C2 Re B5 72.0(2) . . ? 
C1 Re B5 42.8(2) . . ? 
B3 Re B5 75.3(2) . . ? 
C5 Re B4 110.7(3) . . y 
C3 Re B4 101.8(3) . . y 
C4 Re B4 161.9(3) . . y 
C2 Re B4 72.3(2) . . ? 
C1 Re B4 72.6(2) . . ? 
B3 Re B4 44.6(2) . . ? 
B5 Re B4 44.4(2) . . ? 
C5 Re Ag 73.4(2) . . y 
C3 Re Ag 64.7(2) . . y 
C4 Re Ag 141.9(2) . . y 
C2 Re Ag 124.92(17) . . y 
C1 Re Ag 121.50(15) . . y 
B3 Re Ag 85.09(19) . . y 
B5 Re Ag 79.75(18) . . y 
B4 Re Ag 54.84(16) . . y 
C2 C1 B5 111.1(5) . . ? 
C2 C1 B10 111.0(5) . . ? 
B5 C1 B10 62.1(4) . . ? 
C2 C1 B6 62.2(4) . . ? 
B5 C1 B6 113.8(5) . . ? 
B10 C1 B6 62.0(4) . . ? 
C2 C1 Re 69.3(3) . . ? 
B5 C1 Re 70.4(3) . . ? 
B10 C1 Re 129.0(4) . . ? 
B6 C1 Re 129.2(5) . . ? 
C1 C2 B3 112.5(5) . . ? 
C1 C2 B7 111.1(5) . . ? 
B3 C2 B7 63.7(4) . . ? 
C1 C2 B6 62.0(4) . . ? 
B3 C2 B6 115.0(5) . . ? 
B7 C2 B6 61.3(5) . . ? 
C1 C2 Re 69.5(3) . . ? 
B3 C2 Re 70.5(3) . . ? 
B7 C2 Re 130.3(4) . . ? 
B6 C2 Re 129.3(5) . . ? 
C2 B3 B8 103.6(5) . . ? 
C2 B3 B7 58.5(4) . . ? 
B8 B3 B7 58.8(4) . . ? 
C2 B3 B4 104.5(5) . . ? 
B8 B3 B4 59.9(4) . . ? 
B7 B3 B4 106.9(5) . . ? 
C2 B3 Re 66.7(3) . . ? 
B8 B3 Re 123.3(4) . . ? 
B7 B3 Re 122.0(4) . . ? 
B4 B3 Re 68.8(3) . . ? 
H4 B4 B9 114(3) . . ? 
H4 B4 B8 113(3) . . ? 
B9 B4 B8 60.0(4) . . ? 
H4 B4 B5 127(3) . . ? 
B9 B4 B5 59.3(4) . . ? 
B8 B4 B5 106.8(5) . . ? 
H4 B4 B3 124(3) . . ? 
B9 B4 B3 106.8(5) . . ? 
B8 B4 B3 59.1(4) . . ? 
B5 B4 B3 106.5(5) . . ? 
H4 B4 Re 116(3) . . y 
B9 B4 Re 120.9(4) . . ? 
B8 B4 Re 120.7(4) . . ? 
B5 B4 Re 66.8(3) . . ? 
B3 B4 Re 66.6(3) . . ? 
H4 B4 Ag 42(3) . . y 
B9 B4 Ag 139.4(4) . . ? 
B8 B4 Ag 147.8(4) . . ? 
B5 B4 Ag 105.3(4) . . ? 
B3 B4 Ag 113.7(4) . . ? 
Re B4 Ag 75.34(19) . . y 
C1 B5 B10 59.2(4) . . ? 
C1 B5 B9 104.3(5) . . ? 
B10 B5 B9 59.6(4) . . ? 
C1 B5 B4 105.3(5) . . ? 
B10 B5 B4 108.2(5) . . ? 
B9 B5 B4 59.5(4) . . ? 
C1 B5 Re 66.8(3) . . ? 
B10 B5 Re 122.8(4) . . ? 
B9 B5 Re 123.0(4) . . ? 
B4 B5 Re 68.8(3) . . ? 
C1 B6 C2 55.8(4) . . ? 
C1 B6 B11 104.8(5) . . ? 
C2 B6 B11 103.9(5) . . ? 
C1 B6 B7 104.1(5) . . ? 
C2 B6 B7 58.8(4) . . ? 
B11 B6 B7 59.5(4) . . ? 
C1 B6 B10 58.5(4) . . ? 
C2 B6 B10 103.2(5) . . ? 
B11 B6 B10 60.6(4) . . ? 
B7 B6 B10 107.7(5) . . ? 
C2 B7 B11 105.3(5) . . ? 
C2 B7 B8 103.8(5) . . ? 
B11 B7 B8 60.8(4) . . ? 
C2 B7 B6 59.8(4) . . ? 
B11 B7 B6 60.2(4) . . ? 
B8 B7 B6 108.9(5) . . ? 
C2 B7 B3 57.8(4) . . ? 
B11 B7 B3 108.7(5) . . ? 
B8 B7 B3 59.7(4) . . ? 
B6 B7 B3 108.8(5) . . ? 
B7 B8 B11 59.3(4) . . ? 
B7 B8 B3 61.5(4) . . ? 
B11 B8 B3 109.0(5) . . ? 
B7 B8 B9 107.1(5) . . ? 
B11 B8 B9 59.8(4) . . ? 
B3 B8 B9 108.0(5) . . ? 
B7 B8 B4 110.0(5) . . ? 
B11 B8 B4 108.7(5) . . ? 
B3 B8 B4 61.0(4) . . ? 
B9 B8 B4 59.6(4) . . ? 
B10 B9 B5 60.0(4) . . ? 
B10 B9 B11 60.8(4) . . ? 
B5 B9 B11 109.0(5) . . ? 
B10 B9 B4 109.9(5) . . ? 
B5 B9 B4 61.2(4) . . ? 
B11 B9 B4 109.5(5) . . ? 
B10 B9 B8 108.5(5) . . ? 
B5 B9 B8 108.6(5) . . ? 
B11 B9 B8 59.9(4) . . ? 
B4 B9 B8 60.4(4) . . ? 
C1 B10 B9 104.5(5) . . ? 
C1 B10 B5 58.8(4) . . ? 
B9 B10 B5 60.3(4) . . ? 
C1 B10 B6 59.5(4) . . ? 
B9 B10 B6 107.7(5) . . ? 
B5 B10 B6 109.0(5) . . ? 
C1 B10 B11 104.6(5) . . ? 
B9 B10 B11 60.0(4) . . ? 
B5 B10 B11 108.5(5) . . ? 
B6 B10 B11 59.3(4) . . ? 
B7 B11 B6 60.3(5) . . ? 
B7 B11 B9 108.0(5) . . ? 
B6 B11 B9 107.8(5) . . ? 
B7 B11 B8 59.9(4) . . ? 
B6 B11 B8 108.2(5) . . ? 
B9 B11 B8 60.4(4) . . ? 
B7 B11 B10 108.0(5) . . ? 
B6 B11 B10 60.1(5) . . ? 
B9 B11 B10 59.2(4) . . ? 
B8 B11 B10 107.7(5) . . ? 
O3 C3 Re 176.0(9) . . y 
O4 C4 Re 178.2(7) . . y 
O5 C5 Re 175.2(8) . . y 
H4 Ag N31 141.3(19) . . y 
H4 Ag N41 124.1(19) . . y 
N31 Ag N41 69.78(17) . . y 
H4 Ag B4 24.3(19) . . y 
N31 Ag B4 162.15(19) . . y 
N41 Ag B4 124.96(19) . . y 
H4 Ag N21 85.1(18) . . y 
N31 Ag N21 66.38(17) . . y 
N41 Ag N21 133.99(18) . . y 
B4 Ag N21 96.54(19) . . y 
H4 Ag Re 74(2) . . y 
N31 Ag Re 138.29(12) . . y 
N41 Ag Re 113.68(13) . . y 
B4 Ag Re 49.82(15) . . y 
N21 Ag Re 108.05(14) . . y 
C26 N21 C22 117.3(6) . . ? 
C26 N21 Ag 113.9(4) . . y 
C22 N21 Ag 123.8(4) . . y 
N21 C22 C23 123.2(7) . . ? 
C24 C23 C22 119.2(7) . . ? 
C23 C24 C25 119.0(7) . . ? 
C24 C25 C26 117.9(7) . . ? 
N21 C26 C25 123.3(6) . . ? 
N21 C26 C32 115.8(5) . . ? 
C25 C26 C32 120.8(6) . . ? 
C32 N31 C36 118.5(5) . . ? 
C32 N31 Ag 122.6(4) . . y 
C36 N31 Ag 118.0(4) . . y 
N31 C32 C33 121.9(6) . . ? 
N31 C32 C26 115.8(5) . . ? 
C33 C32 C26 122.3(6) . . ? 
C34 C33 C32 119.5(6) . . ? 
C35 C34 C33 118.6(6) . . ? 
C34 C35 C36 120.0(6) . . ? 
N31 C36 C35 121.4(6) . . ? 
N31 C36 C42 116.0(5) . . ? 
C35 C36 C42 122.5(5) . . ? 
C46 N41 C42 118.3(6) . . ? 
C46 N41 Ag 123.1(5) . . y 
C42 N41 Ag 117.4(4) . . y 
N41 C42 C43 121.9(6) . . ? 
N41 C42 C36 117.2(5) . . ? 
C43 C42 C36 120.8(6) . . ? 
C44 C43 C42 118.4(7) . . ? 
C45 C44 C43 120.3(7) . . ? 
C44 C45 C46 118.0(7) . . ? 
N41 C46 C45 123.1(7) . . ? 
Cl1 C50 Cl1 168.7(16) 3_455 4_655 ? 
C50A Cl2 Cl2 57.0(7) 3_545 2_755 ? 
 
_diffrn_measured_fraction_theta_max    0.996
_diffrn_reflns_theta_full              24.96 
_diffrn_measured_fraction_theta_full   0.996
_refine_diff_density_max    1.679 
_refine_diff_density_min   -1.834 
_refine_diff_density_rms    0.150 

#===END
 
data_9 
 
_audit_creation_method            SHELXL-97 
_chemical_name_systematic 
; 
 ? 
; 
_chemical_name_common             ? 
_chemical_melting_point           ? 
_chemical_formula_moiety          ? 
_chemical_formula_sum             'C7.50 H17 Ag B9 O3 Re' 
_chemical_formula_weight          546.57 
 
loop_ 
 _atom_type_symbol 
 _atom_type_description 
 _atom_type_scat_dispersion_real 
 _atom_type_scat_dispersion_imag 
 _atom_type_scat_source 
 'C'  'C'   0.0033   0.0016 
 'International Tables Vol C Tables 4.2.6.8 and 6.1.1.4' 
 'H'  'H'   0.0000   0.0000 
 'International Tables Vol C Tables 4.2.6.8 and 6.1.1.4' 
 'B'  'B'   0.0013   0.0007 
 'International Tables Vol C Tables 4.2.6.8 and 6.1.1.4' 
 'O'  'O'   0.0106   0.0060 
 'International Tables Vol C Tables 4.2.6.8 and 6.1.1.4' 
 'Ag'  'Ag'  -0.8971   1.1015 
 'International Tables Vol C Tables 4.2.6.8 and 6.1.1.4' 
 'Re'  'Re'  -1.0185   7.2310 
 'International Tables Vol C Tables 4.2.6.8 and 6.1.1.4' 
 
_symmetry_cell_setting            Tetragonal 
_symmetry_space_group_name_H-M    'I 41a' 
 
loop_ 
 _symmetry_equiv_pos_as_xyz 
 'x, y, z' 
 '-x+1/2, -y, z+1/2' 
 '-y+3/4, x+1/4, z+1/4' 
 'y+3/4, -x+3/4, z+3/4' 
 'x+1/2, y+1/2, z+1/2' 
 '-x+1, -y+1/2, z+1' 
 '-y+5/4, x+3/4, z+3/4' 
 'y+5/4, -x+5/4, z+5/4' 
 '-x, -y, -z' 
 'x-1/2, y, -z-1/2' 
 'y-3/4, -x-1/4, -z-1/4' 
 '-y-3/4, x-3/4, -z-3/4' 
 '-x+1/2, -y+1/2, -z+1/2' 
 'x, y+1/2, -z' 
 'y-1/4, -x+1/4, -z+1/4' 
 '-y-1/4, x-1/4, -z-1/4' 
 
_cell_length_a                    25.746(3) 
_cell_length_b                    25.746(3) 
_cell_length_c                    8.6695(9) 
_cell_angle_alpha                 90.00 
_cell_angle_beta                  90.00 
_cell_angle_gamma                 90.00 
_cell_volume                      5746.5(10) 
_cell_formula_units_Z             16 
_cell_measurement_temperature     173(2) 
_cell_measurement_reflns_used     ? 
_cell_measurement_theta_min       ? 
_cell_measurement_theta_max       ? 
 
_exptl_crystal_description        needle 
_exptl_crystal_colour             colorless 
_exptl_crystal_size_max           0.40 
_exptl_crystal_size_mid           0.10 
_exptl_crystal_size_min           0.10 
_exptl_crystal_density_meas       ? 
_exptl_crystal_density_diffrn     2.527 
_exptl_crystal_density_method     'not measured' 
_exptl_crystal_F_000              4048 
_exptl_absorpt_coefficient_mu     9.777 
_exptl_absorpt_correction_type    multi-scans 
_exptl_absorpt_correction_T_min   ? 
_exptl_absorpt_correction_T_max   ? 
_exptl_absorpt_process_details    '(SADABS; Sheldrick, 1997)' 
 
_exptl_special_details 
; 
 ? 
; 
 
_diffrn_ambient_temperature       173(2) 
_diffrn_radiation_wavelength      0.71073 
_diffrn_radiation_type            MoK\a 
_diffrn_radiation_source          'fine-focus sealed tube' 
_diffrn_radiation_monochromator   graphite 
_diffrn_measurement_device_type   'Bruker SMART'
_diffrn_measurement_method        ? 
_diffrn_detector_area_resol_mean  ? 
_diffrn_standards_number          ? 
_diffrn_standards_interval_count  ? 
_diffrn_standards_interval_time   ? 
_diffrn_standards_decay_%         ? 
_diffrn_reflns_number             18035 
_diffrn_reflns_av_R_equivalents   0.0363 
_diffrn_reflns_av_sigmaI/netI     0.0197 
_diffrn_reflns_limit_h_min        -33 
_diffrn_reflns_limit_h_max        32 
_diffrn_reflns_limit_k_min        -26 
_diffrn_reflns_limit_k_max        33 
_diffrn_reflns_limit_l_min        -11 
_diffrn_reflns_limit_l_max        11 
_diffrn_reflns_theta_min          1.58 
_diffrn_reflns_theta_max          27.49 
_reflns_number_total              3293 
_reflns_number_gt                 3018 
_reflns_threshold_expression      >2sigma(I) 
 
_computing_data_collection        ? 
_computing_cell_refinement        ? 
_computing_data_reduction         ? 
_computing_structure_solution     'SHELXS-97 (Sheldrick, 1990)' 
_computing_structure_refinement   'SHELXL-97 (Sheldrick, 1997)' 
_computing_molecular_graphics     ? 
_computing_publication_material   ? 
 
_refine_special_details 
; 
 Refinement of F^2^ against ALL reflections.  The weighted R-factor wR and 
 goodness of fit S are based on F^2^, conventional R-factors R are based 
 on F, with F set to zero for negative F^2^. The threshold expression of 
 F^2^ > 2sigma(F^2^) is used only for calculating R-factors(gt) etc. and is 
 not relevant to the choice of reflections for refinement.  R-factors based 
 on F^2^ are statistically about twice as large as those based on F, and R- 
 factors based on ALL data will be even larger. 
; 
 
_refine_ls_structure_factor_coef  Fsqd  
_refine_ls_matrix_type            full 
_refine_ls_weighting_scheme       calc  
_refine_ls_weighting_details 
 ;
calc w=1/[\s^2^(Fo^2^)+(0.0433P)^2^+40.0345P] where
P=(Fo^2^+2Fc^2^)/3
; 
_atom_sites_solution_primary      direct 
_atom_sites_solution_secondary    difmap 
_atom_sites_solution_hydrogens    geom 
_refine_ls_hydrogen_treatment     mixed 
_refine_ls_extinction_method      none 
_refine_ls_extinction_coef        ? 
_refine_ls_number_reflns          3293 
_refine_ls_number_parameters      210 
_refine_ls_number_restraints      2 
_refine_ls_R_factor_all           0.0358 
_refine_ls_R_factor_gt            0.0313 
_refine_ls_wR_factor_ref          0.0812 
_refine_ls_wR_factor_gt           0.0792 
_refine_ls_goodness_of_fit_ref    1.194 
_refine_ls_restrained_S_all       1.195 
_refine_ls_shift/su_max           0.001 
_refine_ls_shift/su_mean          0.000 
 
loop_ 
 _atom_site_label 
 _atom_site_type_symbol 
 _atom_site_fract_x 
 _atom_site_fract_y 
 _atom_site_fract_z 
 _atom_site_U_iso_or_equiv 
 _atom_site_adp_type 
 _atom_site_occupancy 
 _atom_site_symetry_multiplicity 
 _atom_site_calc_flag 
 _atom_site_refinement_flags 
 _atom_site_disorder_assembly 
 _atom_site_disorder_group 
Re Re 0.078077(8) 0.081514(8) 0.09675(2) 0.01626(9) Uani 1 1 d . . . 
Ag Ag 0.03637(2) 0.168847(19) -0.06757(5) 0.03085(13) Uani 1 1 d D . . 
C1 C 0.0581(2) 0.0536(2) 0.3415(6) 0.0190(11) Uani 1 1 d . . . 
H1 H 0.0590 0.0104 0.3258 0.023 Uiso 1 1 calc R . . 
C2 C 0.1114(2) 0.0882(2) 0.3434(6) 0.0195(11) Uani 1 1 d . . . 
H2 H 0.1508 0.0702 0.3304 0.023 Uiso 1 1 calc R . . 
B3 B 0.1011(2) 0.1489(2) 0.2674(7) 0.0180(11) Uani 1 1 d . . . 
H3 H 0.1303 0.1734 0.2050 0.022 Uiso 1 1 calc R . . 
B4 B 0.0322(2) 0.1511(2) 0.2232(7) 0.0171(11) Uani 1 1 d D . . 
H4 H 0.014(3) 0.183(2) 0.138(5) 0.050 Uiso 1 1 d D . . 
B5 B 0.0065(2) 0.0866(2) 0.2680(7) 0.0185(12) Uani 1 1 d . . . 
H5 H -0.0276 0.0693 0.2064 0.022 Uiso 1 1 calc R . . 
B6 B 0.0811(3) 0.0759(3) 0.5169(8) 0.0225(13) Uani 1 1 d . . . 
H6 H 0.0973 0.0509 0.6112 0.027 Uiso 1 1 calc R . . 
B7 B 0.1076(3) 0.1379(3) 0.4721(8) 0.0228(13) Uani 1 1 d . . . 
H7 H 0.1413 0.1542 0.5383 0.027 Uiso 1 1 calc R . . 
B8 B 0.0562(3) 0.1769(2) 0.4002(8) 0.0219(13) Uani 1 1 d . . . 
H8 H 0.054(2) 0.219(3) 0.406(7) 0.018(16) Uiso 1 1 d . . . 
B9 B -0.0013(2) 0.1389(2) 0.3999(7) 0.0193(12) Uani 1 1 d . . . 
H9 H -0.040(3) 0.154(2) 0.423(7) 0.018(16) Uiso 1 1 d . . . 
B10 B 0.0139(2) 0.0765(2) 0.4712(7) 0.0198(12) Uani 1 1 d . . . 
H10 H -0.0146 0.0522 0.5370 0.024 Uiso 1 1 calc R . . 
B11 B 0.0443(3) 0.1321(2) 0.5536(7) 0.0210(12) Uani 1 1 d . . . 
H11 H 0.0356 0.1452 0.6741 0.025 Uiso 1 1 calc R . . 
C11 C 0.0290(2) 0.0605(2) -0.0581(7) 0.0221(11) Uani 1 1 d . . . 
O11 O -0.00288(18) 0.04559(18) -0.1419(5) 0.0302(10) Uani 1 1 d . . . 
C12 C 0.1117(3) 0.0161(2) 0.0500(7) 0.0270(12) Uani 1 1 d . . . 
O12 O 0.1323(2) -0.02200(19) 0.0213(7) 0.0453(13) Uani 1 1 d . . . 
C13 C 0.1290(2) 0.1087(2) -0.0468(7) 0.0256(12) Uani 1 1 d . . . 
O13 O 0.1623(2) 0.12222(19) -0.1248(6) 0.0360(11) Uani 1 1 d . . . 
C21 C 0.2361(9) -0.001(2) 0.508(4) 0.22(3) Uani 1 1 d . . . 
C22 C 0.2259(10) 0.0236(13) 0.595(4) 0.147(14) Uani 1 1 d . . . 
C23 C 0.2247(7) 0.0550(8) 0.613(2) 0.042(4) Uani 0.50 1 d P . . 
 
loop_ 
 _atom_site_aniso_label 
 _atom_site_aniso_U_11 
 _atom_site_aniso_U_22 
 _atom_site_aniso_U_33 
 _atom_site_aniso_U_23 
 _atom_site_aniso_U_13 
 _atom_site_aniso_U_12 
Re 0.01951(13) 0.01515(12) 0.01412(13) 0.00063(7) 0.00085(7) 0.00004(7) 
Ag 0.0445(3) 0.0286(2) 0.0194(2) 0.00627(17) -0.00125(19) 0.0080(2) 
C1 0.023(3) 0.018(2) 0.017(3) 0.0022(19) 0.002(2) -0.001(2) 
C2 0.019(3) 0.021(3) 0.018(3) 0.003(2) -0.004(2) -0.002(2) 
B3 0.017(3) 0.020(3) 0.017(3) -0.001(2) -0.001(2) -0.003(2) 
B4 0.016(3) 0.015(3) 0.020(3) 0.000(2) -0.001(2) -0.001(2) 
B5 0.019(3) 0.021(3) 0.015(3) -0.001(2) -0.002(2) -0.004(2) 
B6 0.025(3) 0.028(3) 0.014(3) 0.004(2) 0.001(2) 0.000(3) 
B7 0.023(3) 0.027(3) 0.018(3) 0.000(2) -0.003(2) -0.003(2) 
B8 0.025(3) 0.017(3) 0.024(3) -0.005(2) 0.000(2) -0.003(2) 
B9 0.019(3) 0.021(3) 0.017(3) -0.001(2) 0.001(2) 0.001(2) 
B10 0.019(3) 0.022(3) 0.018(3) 0.001(2) 0.001(2) -0.002(2) 
B11 0.027(3) 0.021(3) 0.014(3) -0.004(2) -0.006(2) -0.001(2) 
C11 0.029(3) 0.019(3) 0.018(3) 0.002(2) 0.004(2) 0.000(2) 
O11 0.037(3) 0.035(2) 0.018(2) -0.0030(18) -0.0056(18) -0.007(2) 
C12 0.036(3) 0.019(3) 0.025(3) 0.003(2) 0.001(3) 0.002(2) 
O12 0.054(3) 0.027(3) 0.055(3) -0.004(2) 0.012(3) 0.012(2) 
C13 0.034(3) 0.020(3) 0.024(3) 0.000(2) 0.001(2) 0.003(2) 
O13 0.038(3) 0.040(3) 0.030(2) 0.004(2) 0.016(2) -0.002(2) 
C21 0.066(14) 0.46(7) 0.14(2) 0.16(3) -0.025(16) -0.06(2) 
C22 0.098(16) 0.14(2) 0.20(3) 0.10(2) 0.038(17) -0.001(14) 
C23 0.026(7) 0.055(11) 0.046(9) 0.012(8) -0.006(6) -0.012(8) 
 
_geom_special_details 
; 
 All esds (except the esd in the dihedral angle between two l.s. planes) 
 are estimated using the full covariance matrix.  The cell esds are taken 
 into account individually in the estimation of esds in distances, angles 
 and torsion angles; correlations between esds in cell parameters are only 
 used when they are defined by crystal symmetry.  An approximate (isotropic) 
 treatment of cell esds is used for estimating esds involving l.s. planes. 
; 
 
loop_ 
 _geom_bond_atom_site_label_1 
 _geom_bond_atom_site_label_2 
 _geom_bond_distance 
 _geom_bond_site_symmetry_2 
 _geom_bond_publ_flag 
Re C11 1.922(6) . ? 
Re C12 1.937(6) . ? 
Re C13 1.939(6) . ? 
Re C1 2.299(5) . ? 
Re C2 2.311(5) . ? 
Re B3 2.356(6) . ? 
Re B5 2.370(6) . ? 
Re B4 2.410(6) . ? 
Re Ag 2.8702(6) . ? 
Re Re 6.7790(7) 12_666 ? 
Ag H8 2.02(6) 15 ? 
Ag H9 2.08(6) 12_666 ? 
Ag B4 2.564(6) . ? 
Ag B9 2.905(6) 12_666 ? 
Ag B8 2.978(7) 15 ? 
Ag Ag 4.6512(9) 12_666 ? 
Ag Ag 4.6512(9) 15 ? 
Ag H4 1.91(4) . ? 
C1 C2 1.637(8) . ? 
C1 B5 1.701(8) . ? 
C1 B10 1.706(8) . ? 
C1 B6 1.730(9) . ? 
C1 H1 1.1200 . ? 
C2 B7 1.699(9) . ? 
C2 B3 1.715(8) . ? 
C2 B6 1.723(8) . ? 
C2 H2 1.1200 . ? 
B3 B8 1.783(9) . ? 
B3 B7 1.805(9) . ? 
B3 B4 1.817(8) . ? 
B3 H3 1.1200 . ? 
B4 B8 1.783(9) . ? 
B4 B9 1.785(9) . ? 
B4 B5 1.829(9) . ? 
B4 H4 1.20(4) . ? 
B5 B9 1.778(9) . ? 
B5 B10 1.790(9) . ? 
B5 H5 1.1200 . ? 
B6 B11 1.759(9) . ? 
B6 B10 1.777(9) . ? 
B6 B7 1.779(10) . ? 
B6 H6 1.1200 . ? 
B7 B8 1.775(10) . ? 
B7 B11 1.783(9) . ? 
B7 H7 1.1200 . ? 
B8 B9 1.776(9) . ? 
B8 B11 1.788(9) . ? 
B8 H8 1.09(6) . ? 
B9 B10 1.764(9) . ? 
B9 B11 1.785(9) . ? 
B9 H9 1.08(6) . ? 
B10 B11 1.781(9) . ? 
B10 H10 1.1200 . ? 
B11 H11 1.1200 . ? 
C11 O11 1.161(7) . ? 
C12 O12 1.141(8) . ? 
C13 O13 1.146(8) . ? 
C21 C22 1.03(6) . ? 
C21 C22 1.55(5) 7_444 ? 
C21 C23 1.74(6) . ? 
C21 C23 1.75(4) 7_444 ? 
C22 C23 0.82(3) . ? 
C22 C21 1.55(5) 8_444 ? 
C23 C21 1.75(4) 8_444 ? 
 
loop_ 
 _geom_angle_atom_site_label_1 
 _geom_angle_atom_site_label_2 
 _geom_angle_atom_site_label_3 
 _geom_angle 
 _geom_angle_site_symmetry_1 
 _geom_angle_site_symmetry_3 
 _geom_angle_publ_flag 
C11 Re C12 84.4(3) . . ? 
C11 Re C13 95.6(3) . . ? 
C12 Re C13 82.9(2) . . ? 
C11 Re C1 114.2(2) . . ? 
C12 Re C1 91.2(2) . . ? 
C13 Re C1 149.0(2) . . ? 
C11 Re C2 155.8(2) . . ? 
C12 Re C2 95.3(2) . . ? 
C13 Re C2 108.4(2) . . ? 
C1 Re C2 41.61(19) . . ? 
C11 Re B3 144.3(2) . . ? 
C12 Re B3 131.3(2) . . ? 
C13 Re B3 88.1(2) . . ? 
C1 Re B3 73.0(2) . . ? 
C2 Re B3 43.1(2) . . ? 
C11 Re B5 86.7(2) . . ? 
C12 Re B5 121.7(2) . . ? 
C13 Re B5 155.3(2) . . ? 
C1 Re B5 42.7(2) . . ? 
C2 Re B5 72.8(2) . . ? 
B3 Re B5 76.2(2) . . ? 
C11 Re B4 101.8(2) . . ? 
C12 Re B4 163.9(2) . . ? 
C13 Re B4 110.9(2) . . ? 
C1 Re B4 72.7(2) . . ? 
C2 Re B4 72.9(2) . . ? 
B3 Re B4 44.8(2) . . ? 
B5 Re B4 45.0(2) . . ? 
C11 Re Ag 68.16(17) . . ? 
C12 Re Ag 138.13(18) . . ? 
C13 Re Ag 69.63(18) . . ? 
C1 Re Ag 128.29(14) . . ? 
C2 Re Ag 122.66(14) . . ? 
B3 Re Ag 80.17(15) . . ? 
B5 Re Ag 88.69(15) . . ? 
B4 Re Ag 57.32(15) . . ? 
C11 Re Re 122.70(17) . 12_666 ? 
C12 Re Re 132.56(19) . 12_666 ? 
C13 Re Re 58.43(17) . 12_666 ? 
C1 Re Re 107.65(14) . 12_666 ? 
C2 Re Re 74.66(14) . 12_666 ? 
B3 Re Re 34.79(15) . 12_666 ? 
B5 Re Re 99.80(15) . 12_666 ? 
B4 Re Re 55.92(14) . 12_666 ? 
Ag Re Re 55.302(11) . 12_666 ? 
H8 Ag H9 107(3) 15 12_666 ? 
H8 Ag B4 113.5(18) 15 . ? 
H9 Ag B4 123.7(18) 12_666 . ? 
H8 Ag Re 141.2(18) 15 . ? 
H9 Ag Re 110.1(18) 12_666 . ? 
B4 Ag Re 52.27(13) . . ? 
H8 Ag B9 103.4(18) 15 12_666 ? 
H9 Ag B9 16.3(18) 12_666 12_666 ? 
B4 Ag B9 113.31(18) . 12_666 ? 
Re Ag B9 115.36(13) . 12_666 ? 
H8 Ag B8 12.0(18) 15 15 ? 
H9 Ag B8 118.8(18) 12_666 15 ? 
B4 Ag B8 103.58(18) . 15 ? 
Re Ag B8 129.96(13) . 15 ? 
B9 Ag B8 114.56(18) 12_666 15 ? 
H8 Ag Ag 105.2(18) 15 12_666 ? 
H9 Ag Ag 78.4(18) 12_666 12_666 ? 
B4 Ag Ag 54.61(13) . 12_666 ? 
Re Ag Ag 93.471(19) . 12_666 ? 
B9 Ag Ag 63.37(12) 12_666 12_666 ? 
B8 Ag Ag 105.49(13) 15 12_666 ? 
H8 Ag Ag 68.2(18) 15 15 ? 
H9 Ag Ag 131.9(18) 12_666 15 ? 
B4 Ag Ag 46.45(13) . 15 ? 
Re Ag Ag 94.660(19) . 15 ? 
B9 Ag Ag 115.59(12) 12_666 15 ? 
B8 Ag Ag 60.23(13) 15 15 ? 
Ag Ag Ag 58.978(12) 12_666 15 ? 
H8 Ag H4 92(3) 15 . ? 
H9 Ag H4 122(3) 12_666 . ? 
B4 Ag H4 26.2(14) . . ? 
Re Ag H4 78.4(14) . . ? 
B9 Ag H4 107(2) 12_666 . ? 
B8 Ag H4 84(2) 15 . ? 
Ag Ag H4 44(3) 12_666 . ? 
Ag Ag H4 24(2) 15 . ? 
C2 C1 B5 112.7(4) . . ? 
C2 C1 B10 111.4(4) . . ? 
B5 C1 B10 63.4(4) . . ? 
C2 C1 B6 61.5(3) . . ? 
B5 C1 B6 115.5(4) . . ? 
B10 C1 B6 62.3(4) . . ? 
C2 C1 Re 69.6(3) . . ? 
B5 C1 Re 70.9(3) . . ? 
B10 C1 Re 130.5(4) . . ? 
B6 C1 Re 129.1(4) . . ? 
C2 C1 H1 121.6 . . ? 
B5 C1 H1 117.8 . . ? 
B10 C1 H1 116.0 . . ? 
B6 C1 H1 115.4 . . ? 
Re C1 H1 101.1 . . ? 
C1 C2 B7 111.6(4) . . ? 
C1 C2 B3 111.3(4) . . ? 
B7 C2 B3 63.8(4) . . ? 
C1 C2 B6 61.9(3) . . ? 
B7 C2 B6 62.6(4) . . ? 
B3 C2 B6 115.7(4) . . ? 
C1 C2 Re 68.8(3) . . ? 
B7 C2 Re 130.0(4) . . ? 
B3 C2 Re 69.8(3) . . ? 
B6 C2 Re 128.7(4) . . ? 
C1 C2 H2 122.1 . . ? 
B7 C2 H2 115.4 . . ? 
B3 C2 H2 118.5 . . ? 
B6 C2 H2 114.9 . . ? 
Re C2 H2 102.2 . . ? 
C2 B3 B8 102.7(4) . . ? 
C2 B3 B7 57.7(3) . . ? 
B8 B3 B7 59.3(4) . . ? 
C2 B3 B4 105.1(4) . . ? 
B8 B3 B4 59.4(3) . . ? 
B7 B3 B4 107.6(4) . . ? 
C2 B3 Re 67.1(3) . . ? 
B8 B3 Re 122.7(4) . . ? 
B7 B3 Re 121.7(4) . . ? 
B4 B3 Re 69.2(3) . . ? 
C2 B3 H3 126.5 . . ? 
B8 B3 H3 121.2 . . ? 
B7 B3 H3 120.1 . . ? 
B4 B3 H3 122.4 . . ? 
Re B3 H3 106.3 . . ? 
B8 B4 B9 59.7(4) . . ? 
B8 B4 B3 59.4(3) . . ? 
B9 B4 B3 106.6(4) . . ? 
B8 B4 B5 106.3(4) . . ? 
B9 B4 B5 58.9(3) . . ? 
B3 B4 B5 106.2(4) . . ? 
B8 B4 Re 119.9(4) . . ? 
B9 B4 Re 119.8(4) . . ? 
B3 B4 Re 66.0(3) . . ? 
B5 B4 Re 66.4(3) . . ? 
B8 B4 Ag 139.9(4) . . ? 
B9 B4 Ag 153.5(4) . . ? 
B3 B4 Ag 99.9(3) . . ? 
B5 B4 Ag 112.7(3) . . ? 
Re B4 Ag 70.41(16) . . ? 
B8 B4 H4 114(3) . . ? 
B9 B4 H4 117(3) . . ? 
B3 B4 H4 122(4) . . ? 
B5 B4 H4 128(4) . . ? 
Re B4 H4 115(2) . . ? 
Ag B4 H4 45(2) . . ? 
C1 B5 B9 103.1(4) . . ? 
C1 B5 B10 58.4(3) . . ? 
B9 B5 B10 59.3(3) . . ? 
C1 B5 B4 104.6(4) . . ? 
B9 B5 B4 59.3(3) . . ? 
B10 B5 B4 107.6(4) . . ? 
C1 B5 Re 66.4(3) . . ? 
B9 B5 Re 122.2(4) . . ? 
B10 B5 Re 121.8(4) . . ? 
B4 B5 Re 68.7(3) . . ? 
C1 B5 H5 126.4 . . ? 
B9 B5 H5 121.2 . . ? 
B10 B5 H5 119.7 . . ? 
B4 B5 H5 122.8 . . ? 
Re B5 H5 106.8 . . ? 
C2 B6 C1 56.6(3) . . ? 
C2 B6 B11 104.5(4) . . ? 
C1 B6 B11 104.3(4) . . ? 
C2 B6 B10 104.2(4) . . ? 
C1 B6 B10 58.2(3) . . ? 
B11 B6 B10 60.5(4) . . ? 
C2 B6 B7 58.0(4) . . ? 
C1 B6 B7 103.8(4) . . ? 
B11 B6 B7 60.5(4) . . ? 
B10 B6 B7 108.5(5) . . ? 
C2 B6 H6 125.1 . . ? 
C1 B6 H6 125.3 . . ? 
B11 B6 H6 122.7 . . ? 
B10 B6 H6 122.0 . . ? 
B7 B6 H6 122.2 . . ? 
C2 B7 B8 103.7(4) . . ? 
C2 B7 B6 59.3(4) . . ? 
B8 B7 B6 107.4(5) . . ? 
C2 B7 B11 104.4(4) . . ? 
B8 B7 B11 60.3(4) . . ? 
B6 B7 B11 59.2(4) . . ? 
C2 B7 B3 58.5(3) . . ? 
B8 B7 B3 59.7(4) . . ? 
B6 B7 B3 108.6(4) . . ? 
B11 B7 B3 108.5(4) . . ? 
C2 B7 H7 125.0 . . ? 
B8 B7 H7 122.9 . . ? 
B6 B7 H7 121.4 . . ? 
B11 B7 H7 122.4 . . ? 
B3 B7 H7 121.1 . . ? 
B7 B8 B9 108.1(5) . . ? 
B7 B8 B4 110.5(4) . . ? 
B9 B8 B4 60.2(3) . . ? 
B7 B8 B3 61.0(4) . . ? 
B9 B8 B3 108.5(4) . . ? 
B4 B8 B3 61.3(3) . . ? 
B7 B8 B11 60.1(4) . . ? 
B9 B8 B11 60.1(4) . . ? 
B4 B8 B11 109.9(4) . . ? 
B3 B8 B11 109.3(5) . . ? 
B7 B8 H8 126(3) . . ? 
B9 B8 H8 121(3) . . ? 
B4 B8 H8 113(3) . . ? 
B3 B8 H8 118(3) . . ? 
B11 B8 H8 127(3) . . ? 
B10 B9 B8 108.4(5) . . ? 
B10 B9 B5 60.7(4) . . ? 
B8 B9 B5 108.9(4) . . ? 
B10 B9 B11 60.2(4) . . ? 
B8 B9 B11 60.3(4) . . ? 
B5 B9 B11 109.3(4) . . ? 
B10 B9 B4 110.7(4) . . ? 
B8 B9 B4 60.1(3) . . ? 
B5 B9 B4 61.8(3) . . ? 
B11 B9 B4 109.9(4) . . ? 
B10 B9 H9 118(3) . . ? 
B8 B9 H9 124(3) . . ? 
B5 B9 H9 120(3) . . ? 
B11 B9 H9 120(3) . . ? 
B4 B9 H9 122(3) . . ? 
C1 B10 B9 103.4(4) . . ? 
C1 B10 B6 59.5(4) . . ? 
B9 B10 B6 107.6(4) . . ? 
C1 B10 B11 104.4(4) . . ? 
B9 B10 B11 60.5(4) . . ? 
B6 B10 B11 59.3(4) . . ? 
C1 B10 B5 58.2(3) . . ? 
B9 B10 B5 60.0(3) . . ? 
B6 B10 B5 108.9(4) . . ? 
B11 B10 B5 109.0(4) . . ? 
C1 B10 H10 125.4 . . ? 
B9 B10 H10 122.9 . . ? 
B6 B10 H10 121.2 . . ? 
B11 B10 H10 122.2 . . ? 
B5 B10 H10 120.9 . . ? 
B6 B11 B10 60.2(4) . . ? 
B6 B11 B7 60.3(4) . . ? 
B10 B11 B7 108.1(5) . . ? 
B6 B11 B9 107.5(4) . . ? 
B10 B11 B9 59.3(3) . . ? 
B7 B11 B9 107.3(4) . . ? 
B6 B11 B8 107.7(5) . . ? 
B10 B11 B8 107.2(4) . . ? 
B7 B11 B8 59.6(4) . . ? 
B9 B11 B8 59.6(4) . . ? 
B6 B11 H11 121.6 . . ? 
B10 B11 H11 121.9 . . ? 
B7 B11 H11 121.7 . . ? 
B9 B11 H11 122.4 . . ? 
B8 B11 H11 122.2 . . ? 
O11 C11 Re 174.3(5) . . ? 
O12 C12 Re 178.7(6) . . ? 
O13 C13 Re 174.0(6) . . ? 
C22 C21 C22 150(4) . 7_444 ? 
C22 C21 C23 18(2) . . ? 
C22 C21 C23 140(3) 7_444 . ? 
C22 C21 C23 126(3) . 7_444 ? 
C22 C21 C23 28.0(14) 7_444 7_444 ? 
C23 C21 C23 124(2) . 7_444 ? 
C23 C22 C21 140(5) . . ? 
C23 C22 C21 90(4) . 8_444 ? 
C21 C22 C21 118(3) . 8_444 ? 
C22 C23 C21 23(3) . . ? 
C22 C23 C21 62(3) . 8_444 ? 
C21 C23 C21 79.1(15) . 8_444 ? 
 
_diffrn_measured_fraction_theta_max    0.997 
_diffrn_reflns_theta_full              27.49 
_diffrn_measured_fraction_theta_full   0.997 
_refine_diff_density_max    1.770 
_refine_diff_density_min   -1.920 
_refine_diff_density_rms    0.190 

#===END
